# Supplementary material for: AAGGG repeat expansions trigger RFC1-independent synaptic dysregulation in human CANVAS neurons
Source: PubMed Central journal article supplement (PMC11373605; doi:10.1126/sciadv.adn2321), 2024-09-04

Supplementary Materials for  
**AAGGG repeat expansions trigger *RFC1*-independent synaptic dysregulation  
in human CANVAS neurons**

Connor J. Maltby *et al.*

Corresponding author: Peter K. Todd, [petertod@med.umich.edu](mailto:petertod@med.umich.edu)

*Sci. Adv.* **10**, eadn2321 (2024)  
DOI: 10.1126/sciadv.adn2321

**The PDF file includes:**

Figs. S1 to S15  
Tables S1 to S4  
Legends for movies S1 to S3

**Other Supplementary Material for this manuscript includes the following:**

Movies S1 to S3

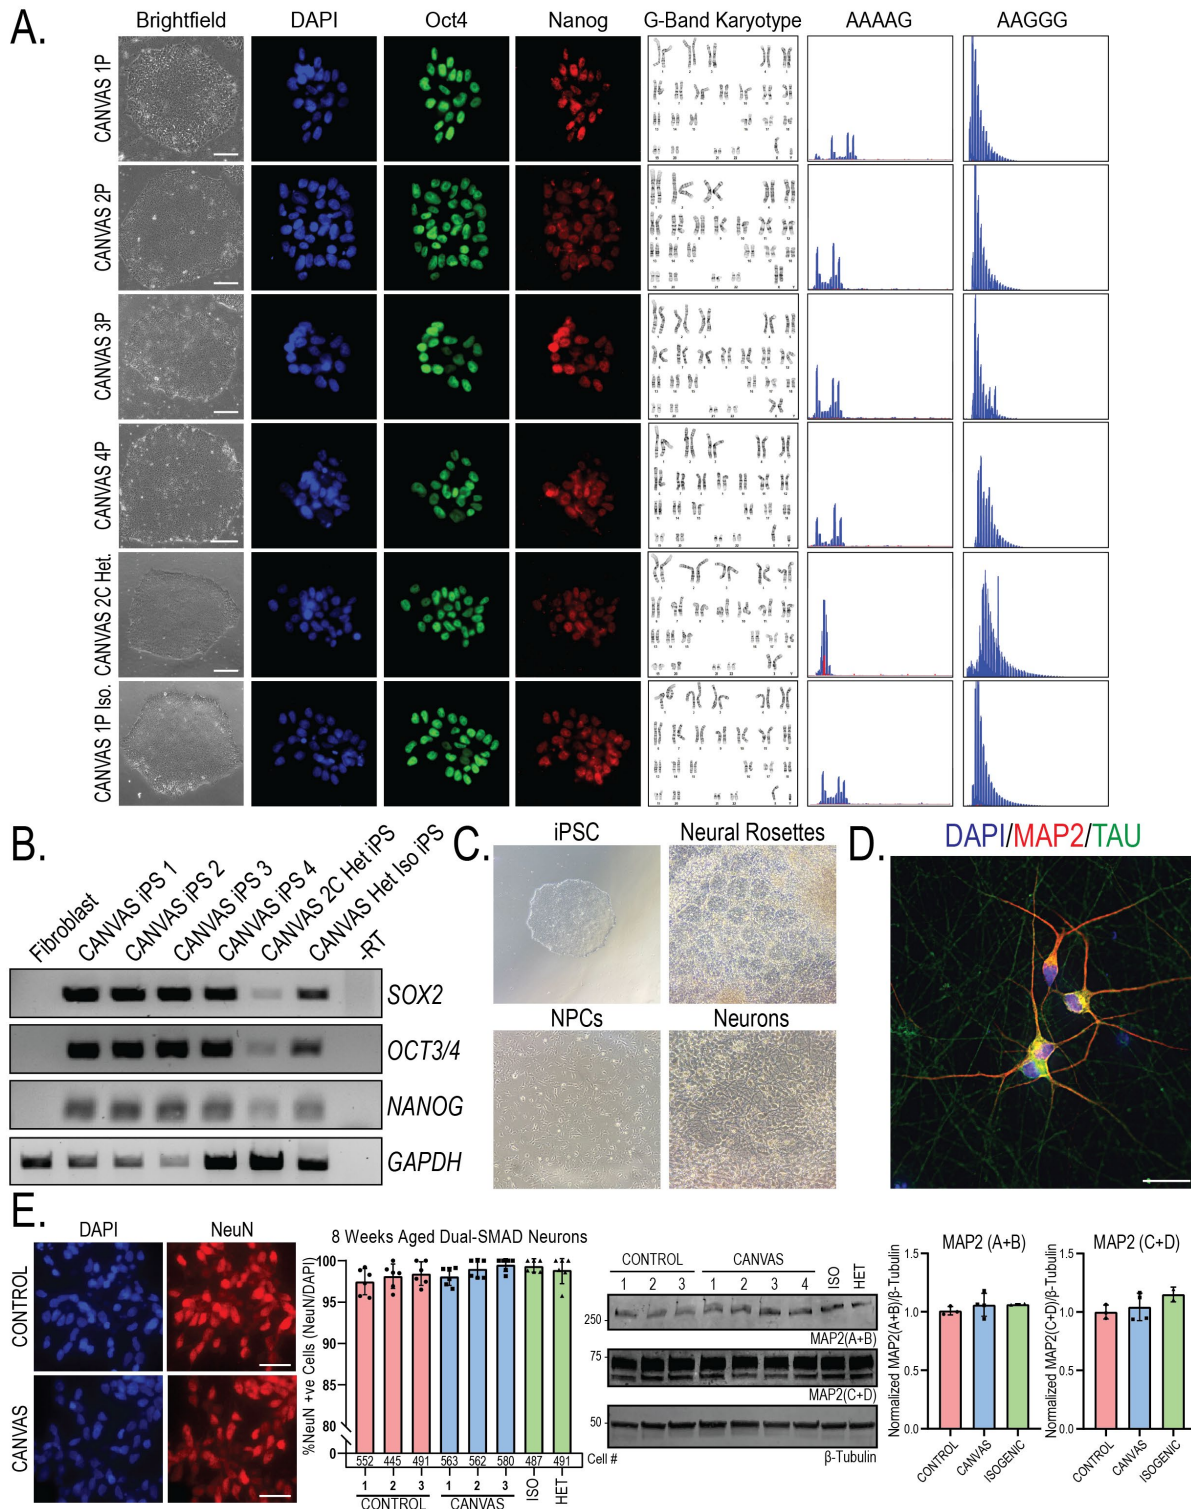

**Fig. S1. Generation, characterization, and differentiation of CANVAS patient iPSC-derived neurons.** A) G-Band Karyotype analysis (WiCel), Immunocytochemistry of CANVAS patient iPSCs for the pluripotency markers OCT4 and NANOG, scale = 25  $\mu$ m, and repeat primed PCR for AAAAG/AAGGG expansions in all patient-derived iPSC lines. B) RT-PCR of CANVAS patient derived iPSCs for the pluripotency mRNA markers *SOX2*, *OCT3/4*, and *NANOG*. C) Brightfield images of the stages of neuronal differentiation from patient-derived iPSCs, showing iPSCs, neural rosettes, neural

progenitor cells, mass-differentiated neuronal cells and re-plated neuronal cells for experimentation. D) Immunocytochemistry of a representative patient iPSC-derived neurons stained for the neuronal markers Tau and MAP2. Scale = 25  $\mu$ m. E) Immunocytochemistry and protein analysis from 6-weeks aged iPSC-derived neurons analyzing neuronal markers (NeuN) vs DAPI and MAP2 vs  $\beta$ -Tubulin respectively to quantify efficiency of differentiation to neuronal cell populations across cell lines.

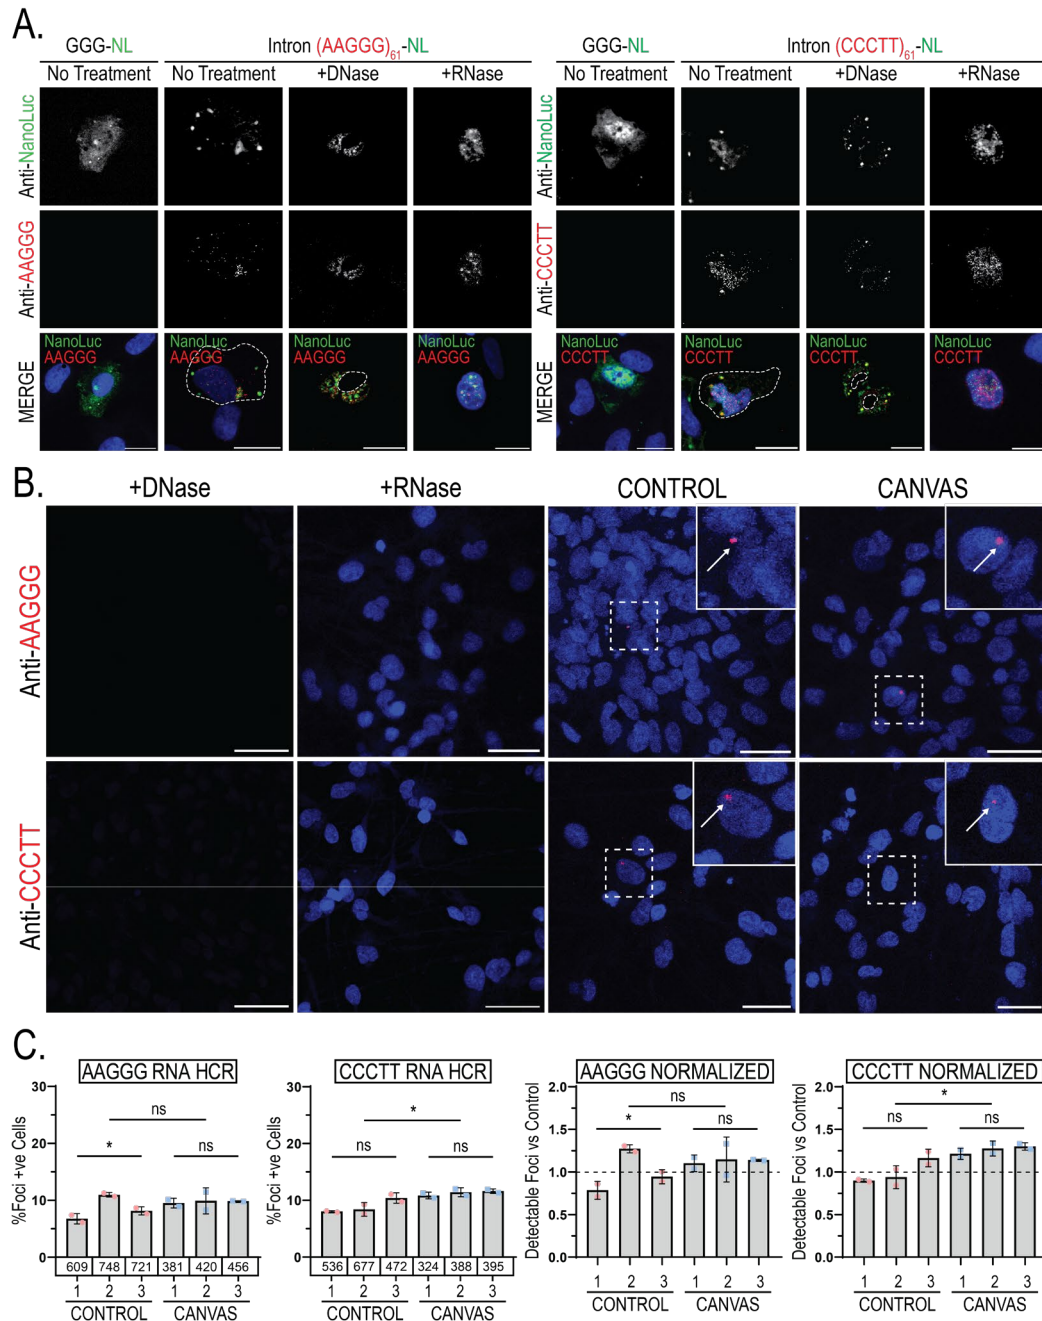

**Fig. S2. RNA HCR probe validation and analysis of RNA foci formation in CANVAS patient and control iPSC-derived neurons.** A) Confocal images of HEK293 cells transfected with control GGG-NL plasmid or plasmid expressing intronic AAGGG or CCCTT expansion followed by RNA HCR-FISH for AAGGG and CCCTT RNAs. Cells were fixed and treated with either anti-Nanoluc, anti-AAGGG, or anti-CCCTT fluorescent probes after no treatment, DNase, or RNase treatment to assess probe specificity. Scale = 10  $\mu$ m. B) Confocal Images of representative CANVAS and control patient iPSC-derived neurons after RNA HCR-FISH utilizing either anti-AAGGG or anti-CCCTT fluorescent probes to assess sense or antisense RNA foci formation. Scale = 10  $\mu$ m. C) Quantification of foci positive neurons for control (n=3) and CANVAS (n=3) patient iPSC-derived neurons with total n-numbers of neuronal cells analyzed per cell line indicated. AAGGG (F(5, 12) = 3.619, P=0.074), CCCTT (F(5, 12) = 8.293, P=0.011). Data were analyzed by one-way ANOVA with Sidak's post-hoc multiple comparison tests. Error = SD.

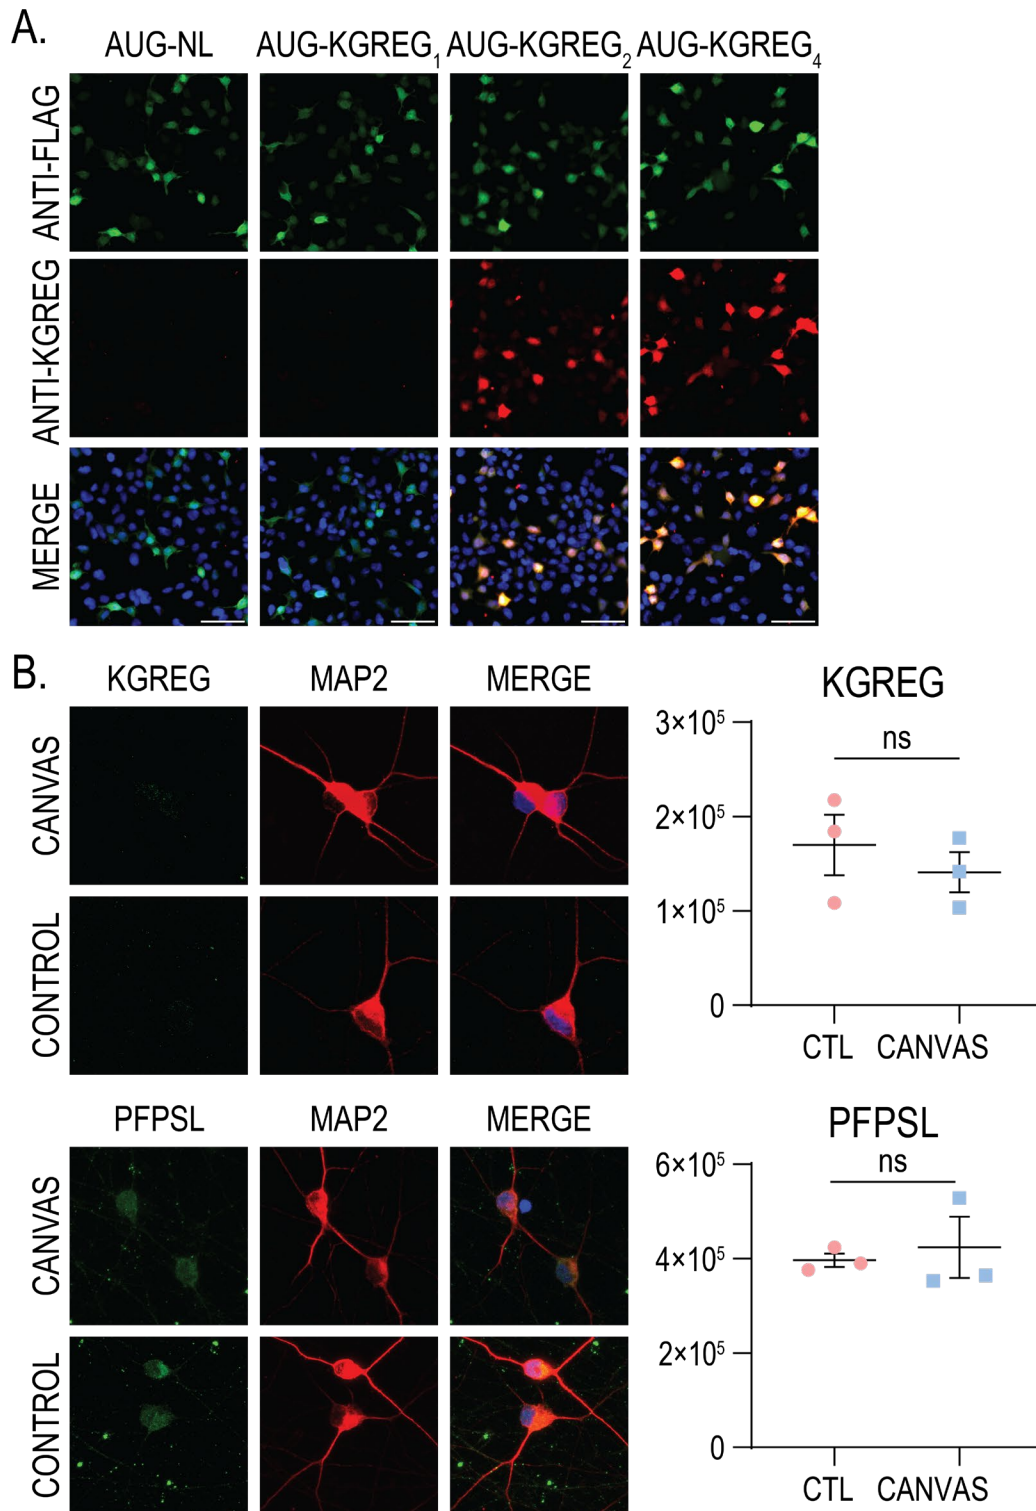

**Fig. S3. Analysis of repeat-derived peptides using KGREG & PFPSL antibodies.** A) ICC of HEK293 cells transfected with control plasmid or plasmids expressing 1x, 2x, and 4x KGREG FLAG-tagged plasmids using anti-FLAG M2 (1:100) and anti-KGREG (1:100) antibodies, scale = 25  $\mu$ m. B) Immunocytochemistry and quantifications of 8-weeks aged control (n=3) and CANVAS (n=3) iPSC-derived neurons for sense AAGGG-derived KGREG peptides and antisense CCCTT-derived PFPSL peptides.

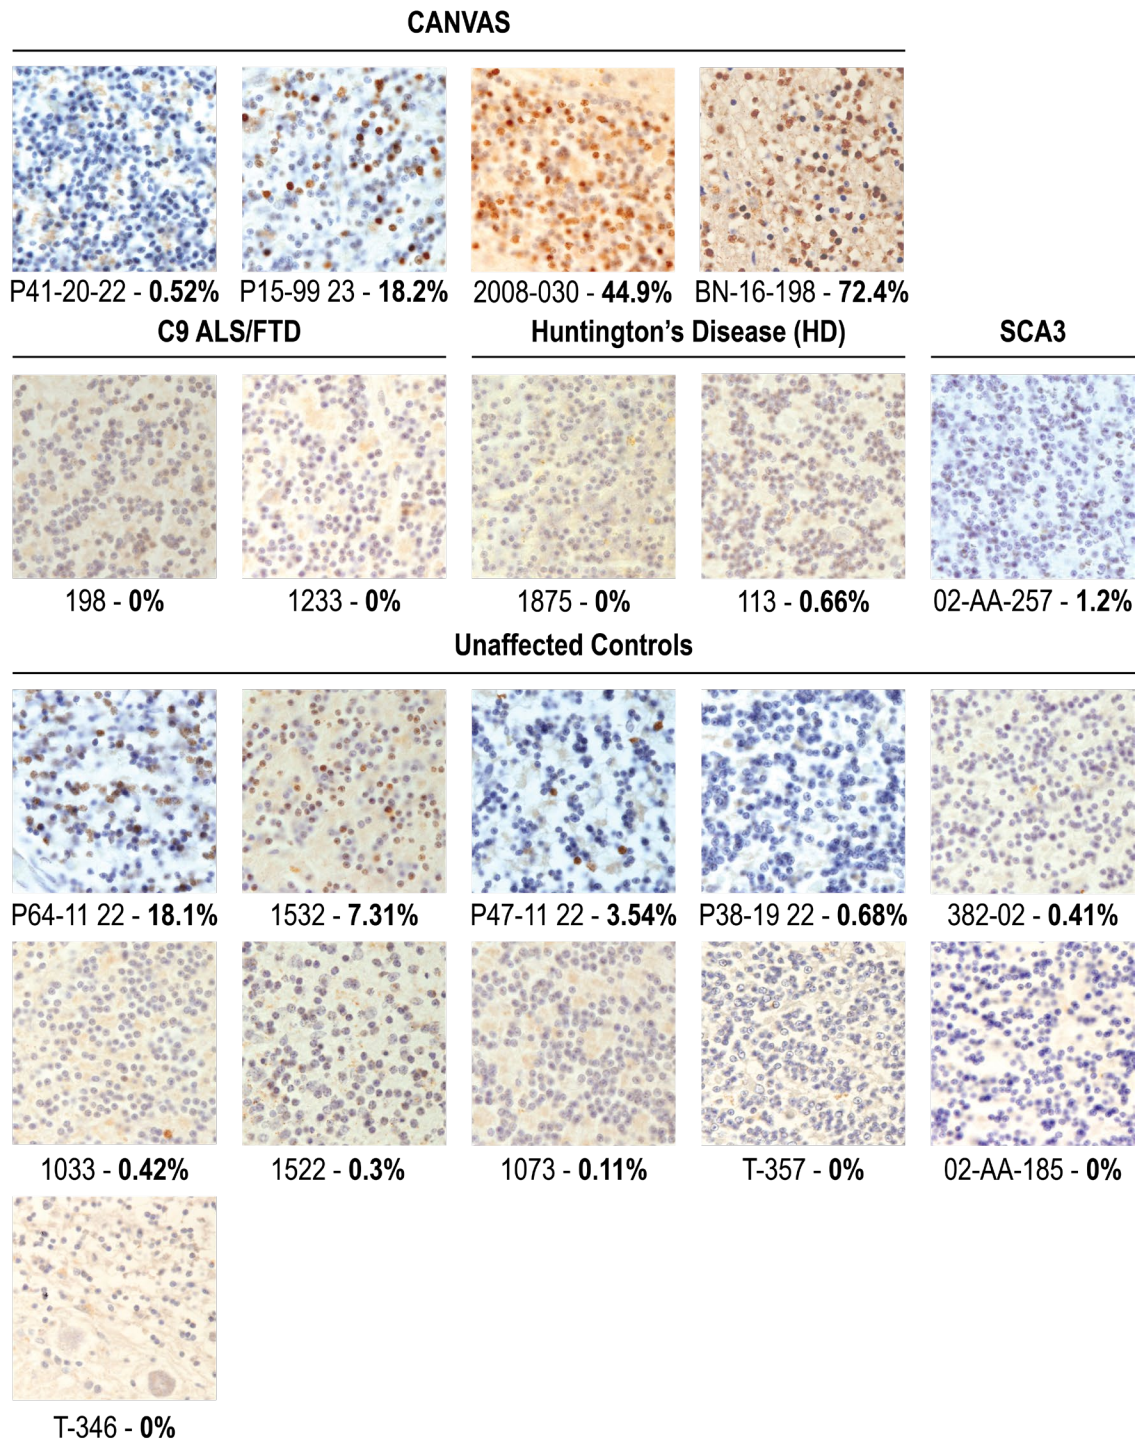

**Fig. S4. Supplementary IHC cerebellar staining of control and CANVAS brains for sense-derived AAGGG peptides.** 60x magnification immunohistochemistry images of control (n=16, including disease controls from cases of Spinocerebellar Ataxia Type 3 (n=1), C9orf72 associated FTD/ALS (n=2), Huntington's disease (n=2), and 11 non-disease controls) and RFC1 expansion CANVAS (n=4) patient post-mortem cerebellar vermis tissue stained with antisense anti-KGREG antibodies (1:100, acid AR).

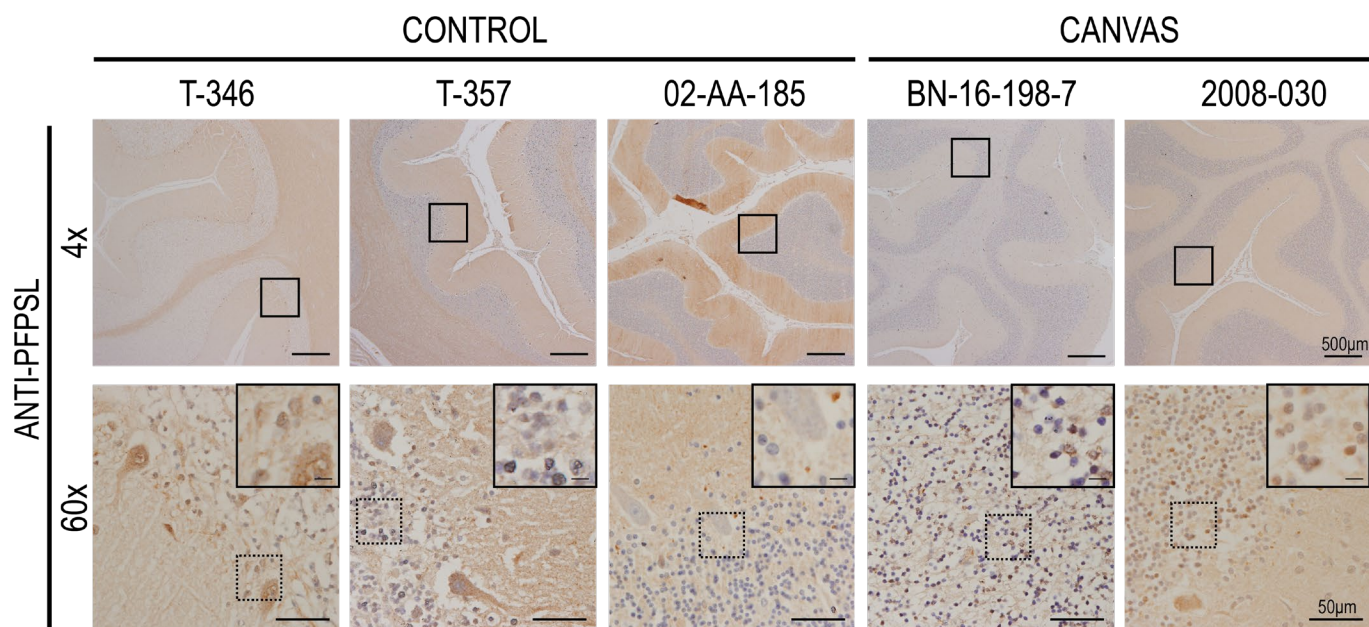

**Fig. S5. Supplementary IHC cerebellar staining of control and CANVAS brains for antisense-derived PFPSL peptides.** Immunohistochemistry of control (n=3) and RFC1 expansion CANVAS (n=2) patient post-mortem cerebellar vermis tissue stained with antisense anti-PFPSL antibodies (1:100, acid AR). Scale = 500  $\mu$ m (4x), 50  $\mu$ m (60x) and 20  $\mu$ m (inset).

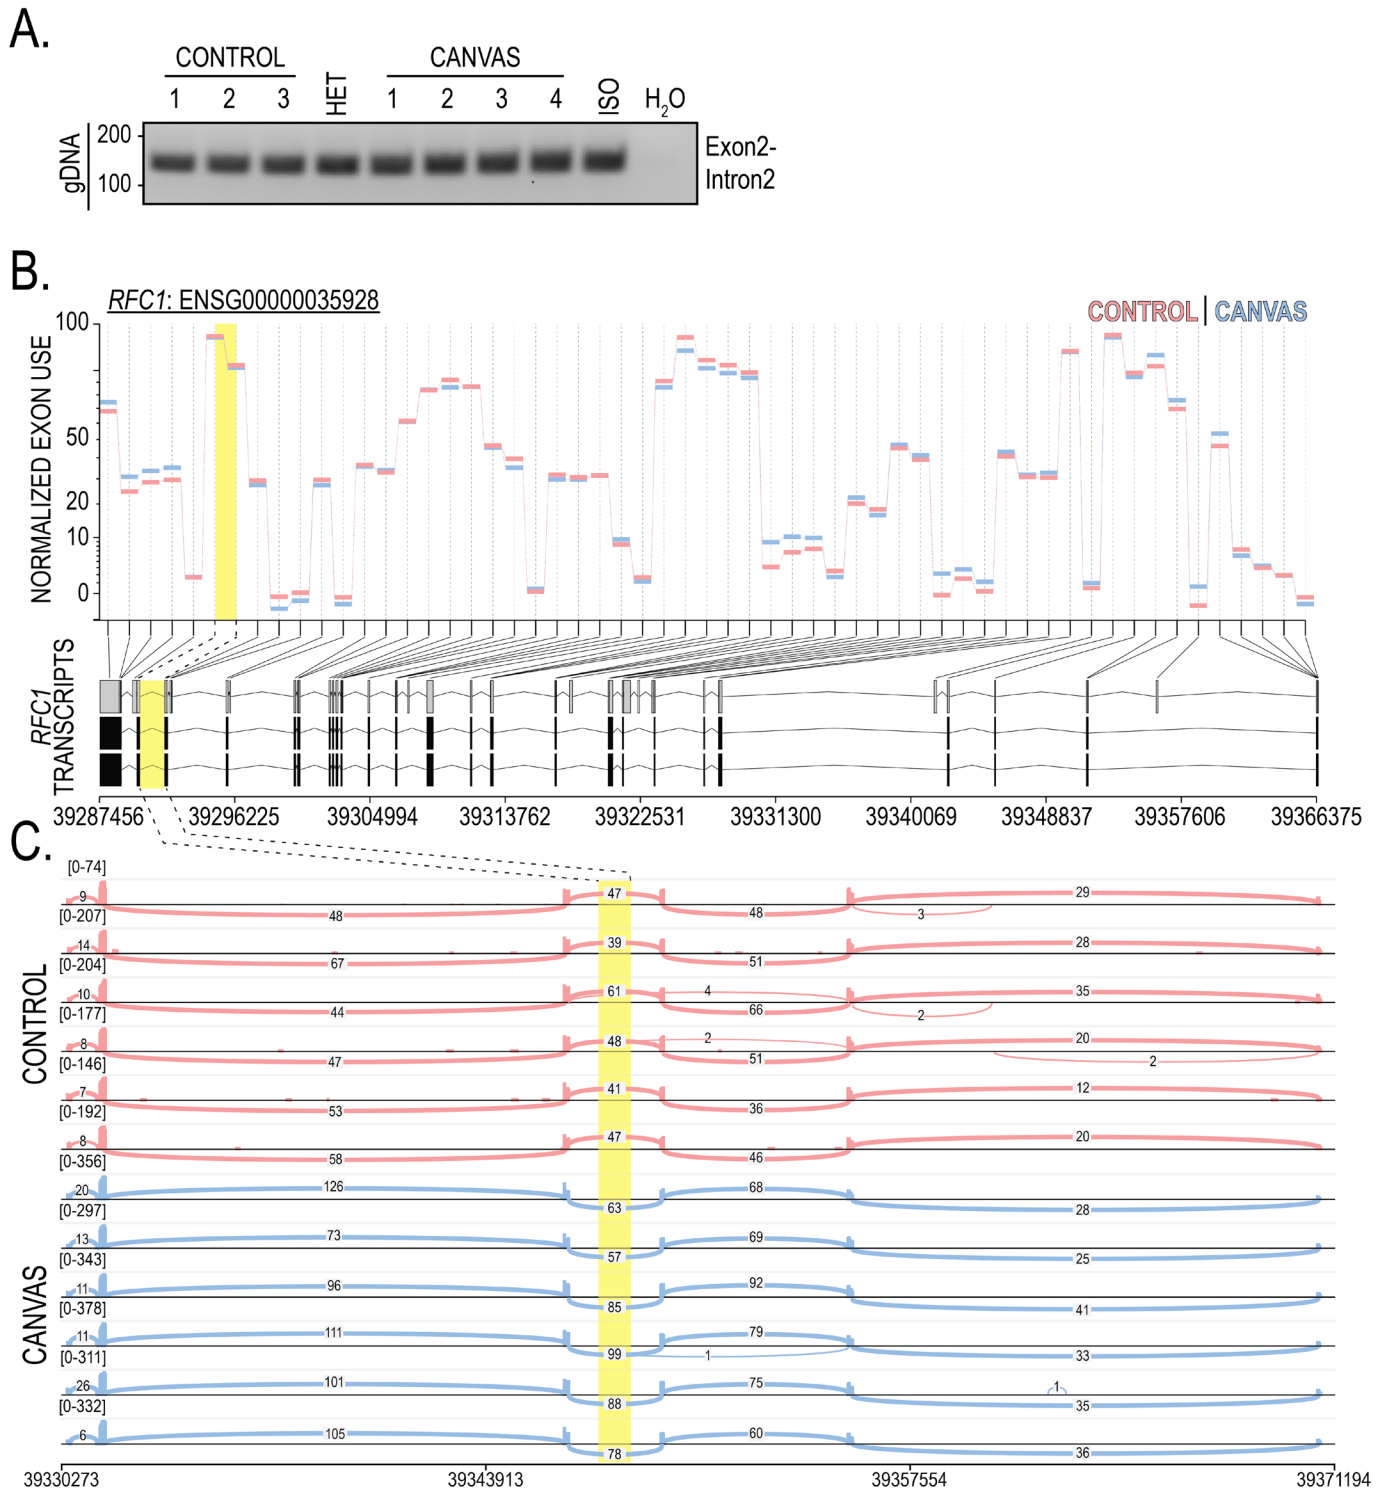

**Fig. S6. Analysis of *RFC1* isoform and alternative exon usage RNA short-read sequencing.** A) Endpoint RT-PCR utilizing primer sets spanning *RFC1* exon2-intron2 with gDNA extracted from control (n=2), CANVAS (n=4), Heterozygous (n=1), and Heterozygous Isogenic (n=1) iPSCs as a positive control for primer set efficiency. B) Normalized exon usage for *RFC1* mRNA transcripts in CANVAS patient iPSC-derived neurons, analyzed by DEXSeq of paired-end RNASeq reads. C) Sashimi plot of *RFC1* exons 1-5 in CANVAS patient iPSC-derived neurons indicating no skipping of exons flanking the intron 2 repeat expansion region (highlighted yellow).



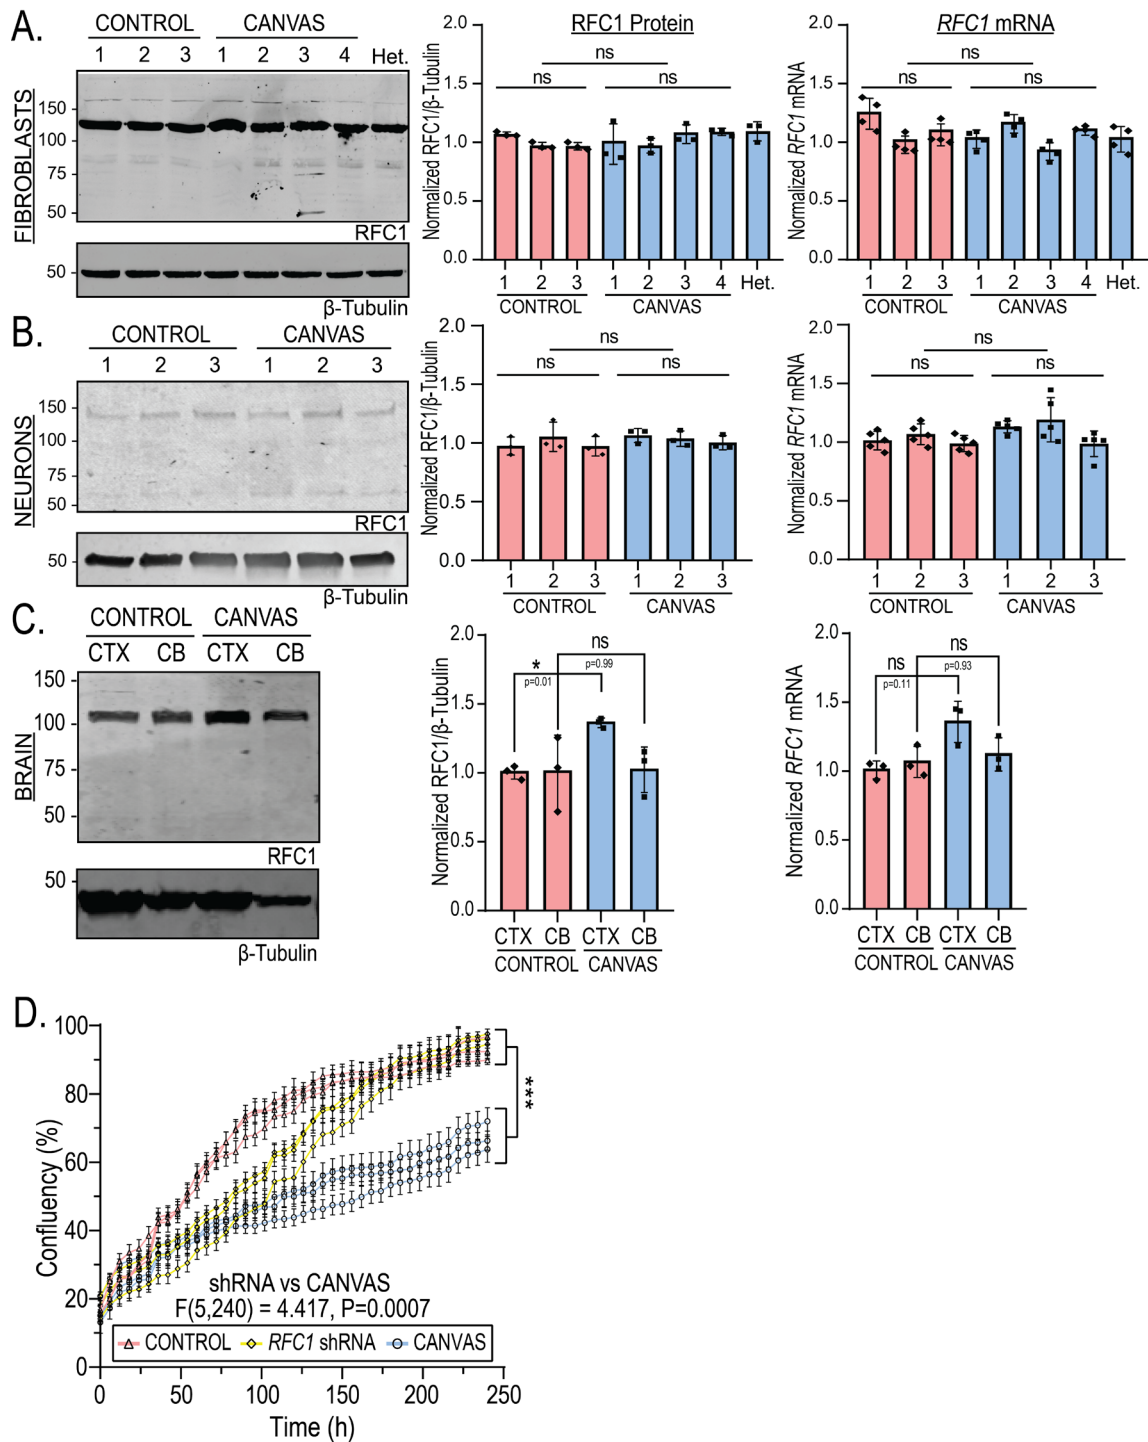

**Fig. S7. RFC1 protein and mRNA expression is maintained in AAGGG expansion contexts.** A) Analysis of RFC1 expression (left), quantification of normalized RFC1 expression (center,  $F(7,24) = 1.592, P=0.208$ ), and quantification of normalized *RFC1* mRNA expression (right,  $F(7,24) = 4.944, P=0.0014$ ) from CANVAS ( $n=4$ ) and control ( $n=3$ ) patient-derived fibroblasts. B) Analysis of RFC1 expression (left), quantification of normalized RFC1 expression (center,  $F(5,18) = 0.707, P=0.629$ ), and quantification of normalized RFC1 mRNA expression (right,  $F(5,24) = 3.029, P=0.029$ ) from CANVAS and control ( $n=3$ ) patient iPSC-derived neurons. C) Analysis of RFC1 protein (left), quantification of normalized RFC1 protein expression (center,  $F(3,8) = 2.010, P=0.191$ ) from CANVAS ( $n=1$ ) and control

(n=1) patient post-mortem brain tissue, and quantification of normalized RFC1 mRNA expression (right,  $F(3,8) = 5.171$ ,  $P=0.0281$ ). N = 3 biological replicates. Data were analyzed by one-way ANOVA with Sidak's post-hoc multiple comparison tests. Error = SD. D) 10-day time-course analysis of the rate of cellular division and proliferation in control fibroblasts (n=3) or CANVAS fibroblast lines (n=3) mock-treated or treated with RFC1 overexpression lentivirus ( $F(5,240) = 2.358$ ,  $P=0.245$ ). N = 3 biological replicates from 3 independent patient cell lines. Data were analyzed by one-way ANOVA with Sidak's post-hoc multiple comparison tests.

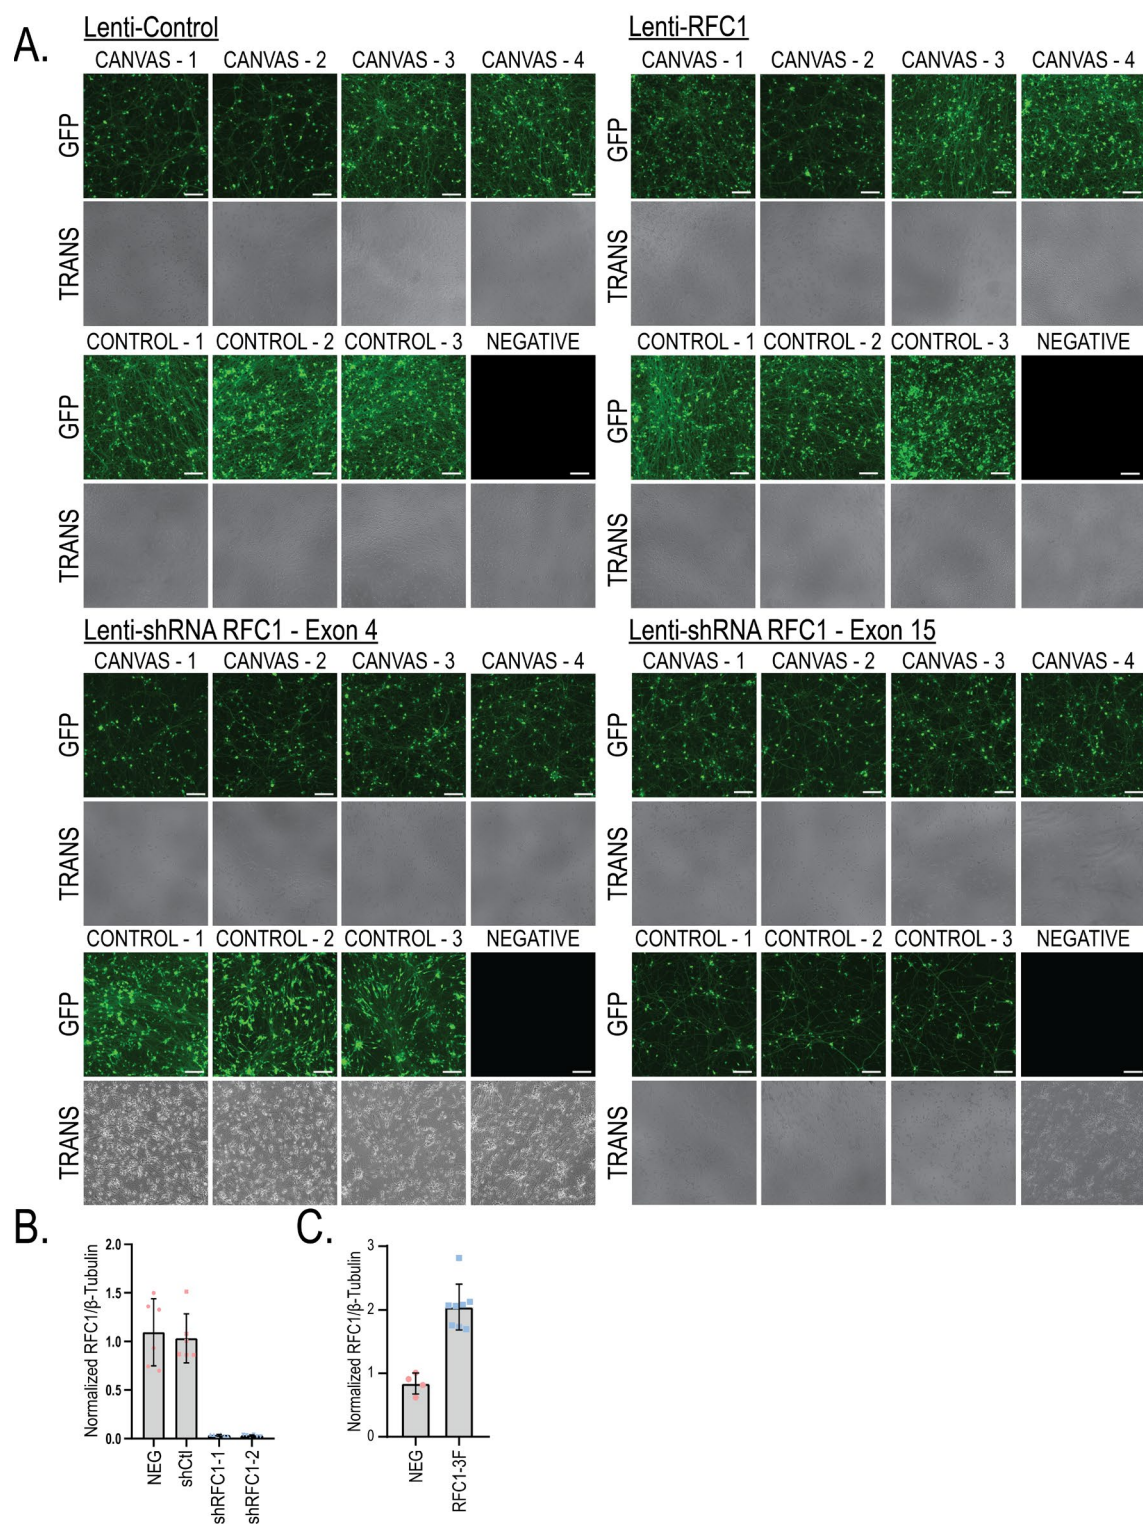

**Fig. S8. Efficiency of lentiviral transduction in CANVAS patient and control iPSC-derived neurons.** A) Brightfield and GFP fluorescence images of CANVAS (n=4) and control (n=3) patient iPSC-derived neurons transduced with control lentivirus, RFC1 overexpression lentivirus, or lentiviruses encoding shRNAs to knockdown RFC1 at exon4 or exon15. Scale = 50  $\mu$ m. B-C) Quantification of immunoblots presented in main Fig. 7A & E upon shRNA RFC1 lentivirus treatment (B) or RFC1 overexpression lentivirus treatment (C) to assess for lentivirus efficiency.

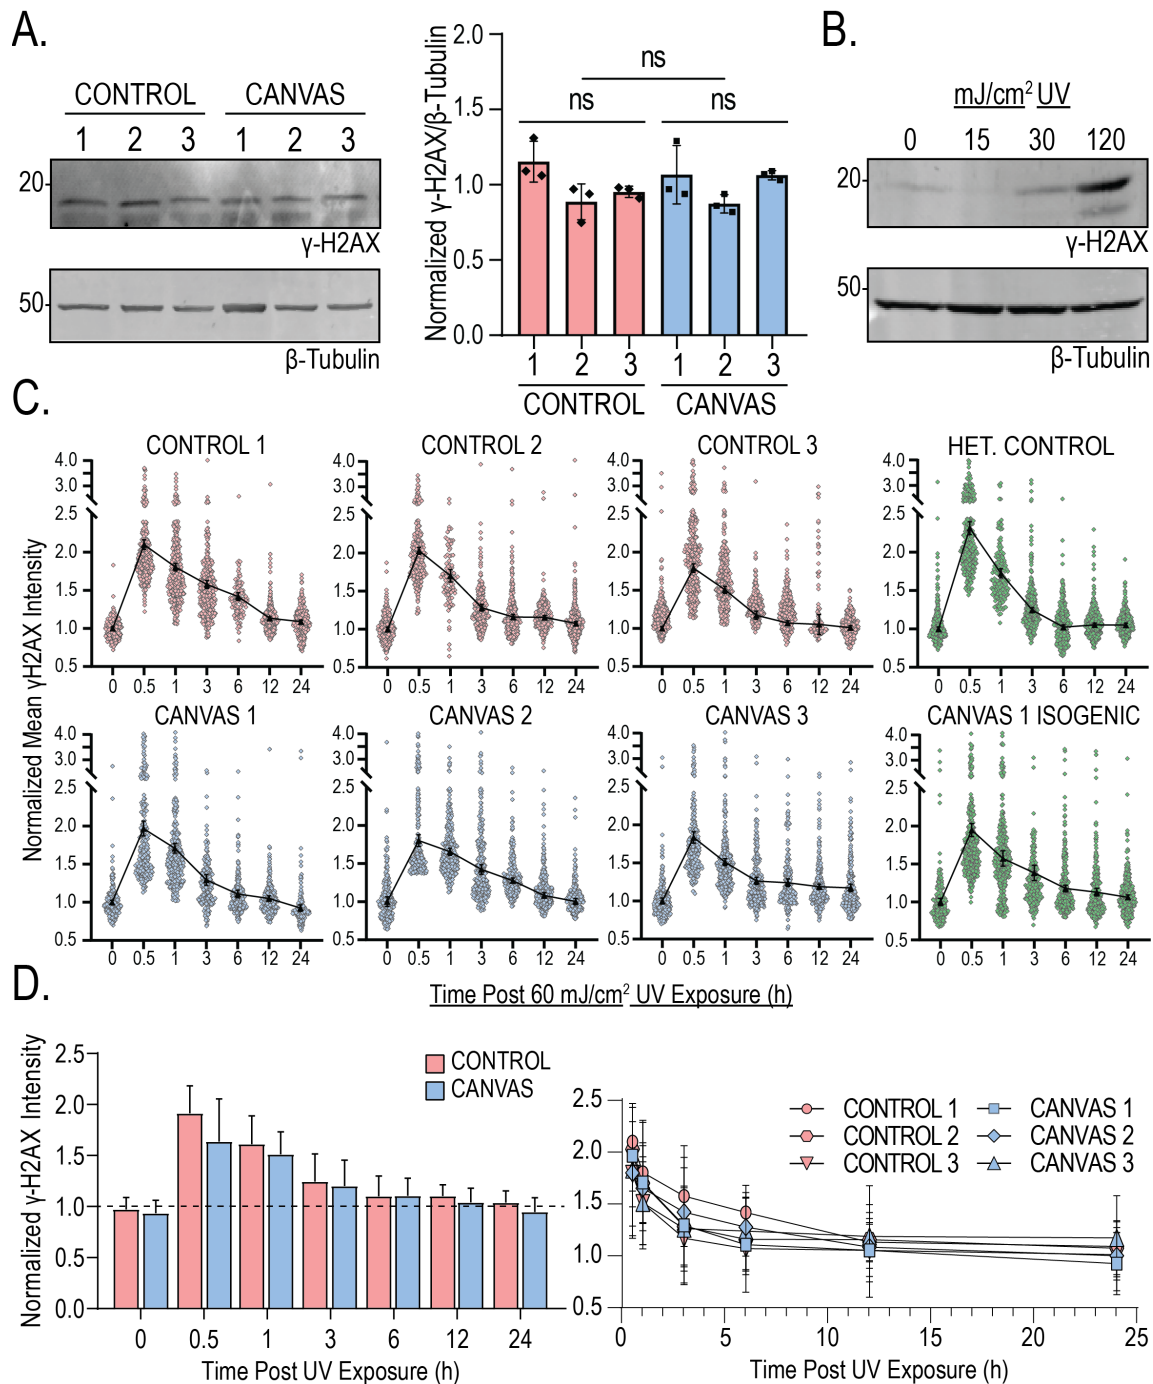

**Fig. S9. Analysis of DNA damage accumulation and recovery in patient iPSC-derived neurons.**

A) Analysis of  $\gamma$ -H2AX expression (left), and quantification of normalized  $\gamma$ -H2AX levels (right,  $F(5, 18) = 2.962$ ,  $P=0.057$ ) from CANVAS ( $n=3$ ) and control ( $n=3$ ) patient iPSC-derived neurons. Data were analyzed by one-way ANOVA with Sidak's post-hoc multiple comparison tests.  $N = 3$  biological replicates. B) Analysis of  $\gamma$ -H2AX levels in control iPSC-derived neurons exposed to 0, 15, 30, and 120  $\text{mJ}/\text{cm}^2$  UV irradiation. C) Quantification of mean  $\gamma$ -H2AX staining in control ( $n=3$ ), CANVAS ( $n=3$ ), heterozygous *RFC1* expansion ( $n=1$ ), and CANVAS heterozygous isogenic corrected ( $n=1$ ) patient iPSC-derived NeuN<sup>+</sup> neuronal nuclei over a 24h period after 60  $\text{mJ}/\text{cm}^2$  UV exposure. D) Comparison of control ( $n=3$ ) and CANVAS ( $n=3$ )  $\gamma$ -H2AX levels after 60  $\text{mJ}/\text{cm}^2$  UV exposure (left) and comparison of first derivative rates of  $\gamma$ -H2AX decline (right,  $F(5, 30) = 0.033$ ,  $P=0.999$ ). Error = SD.

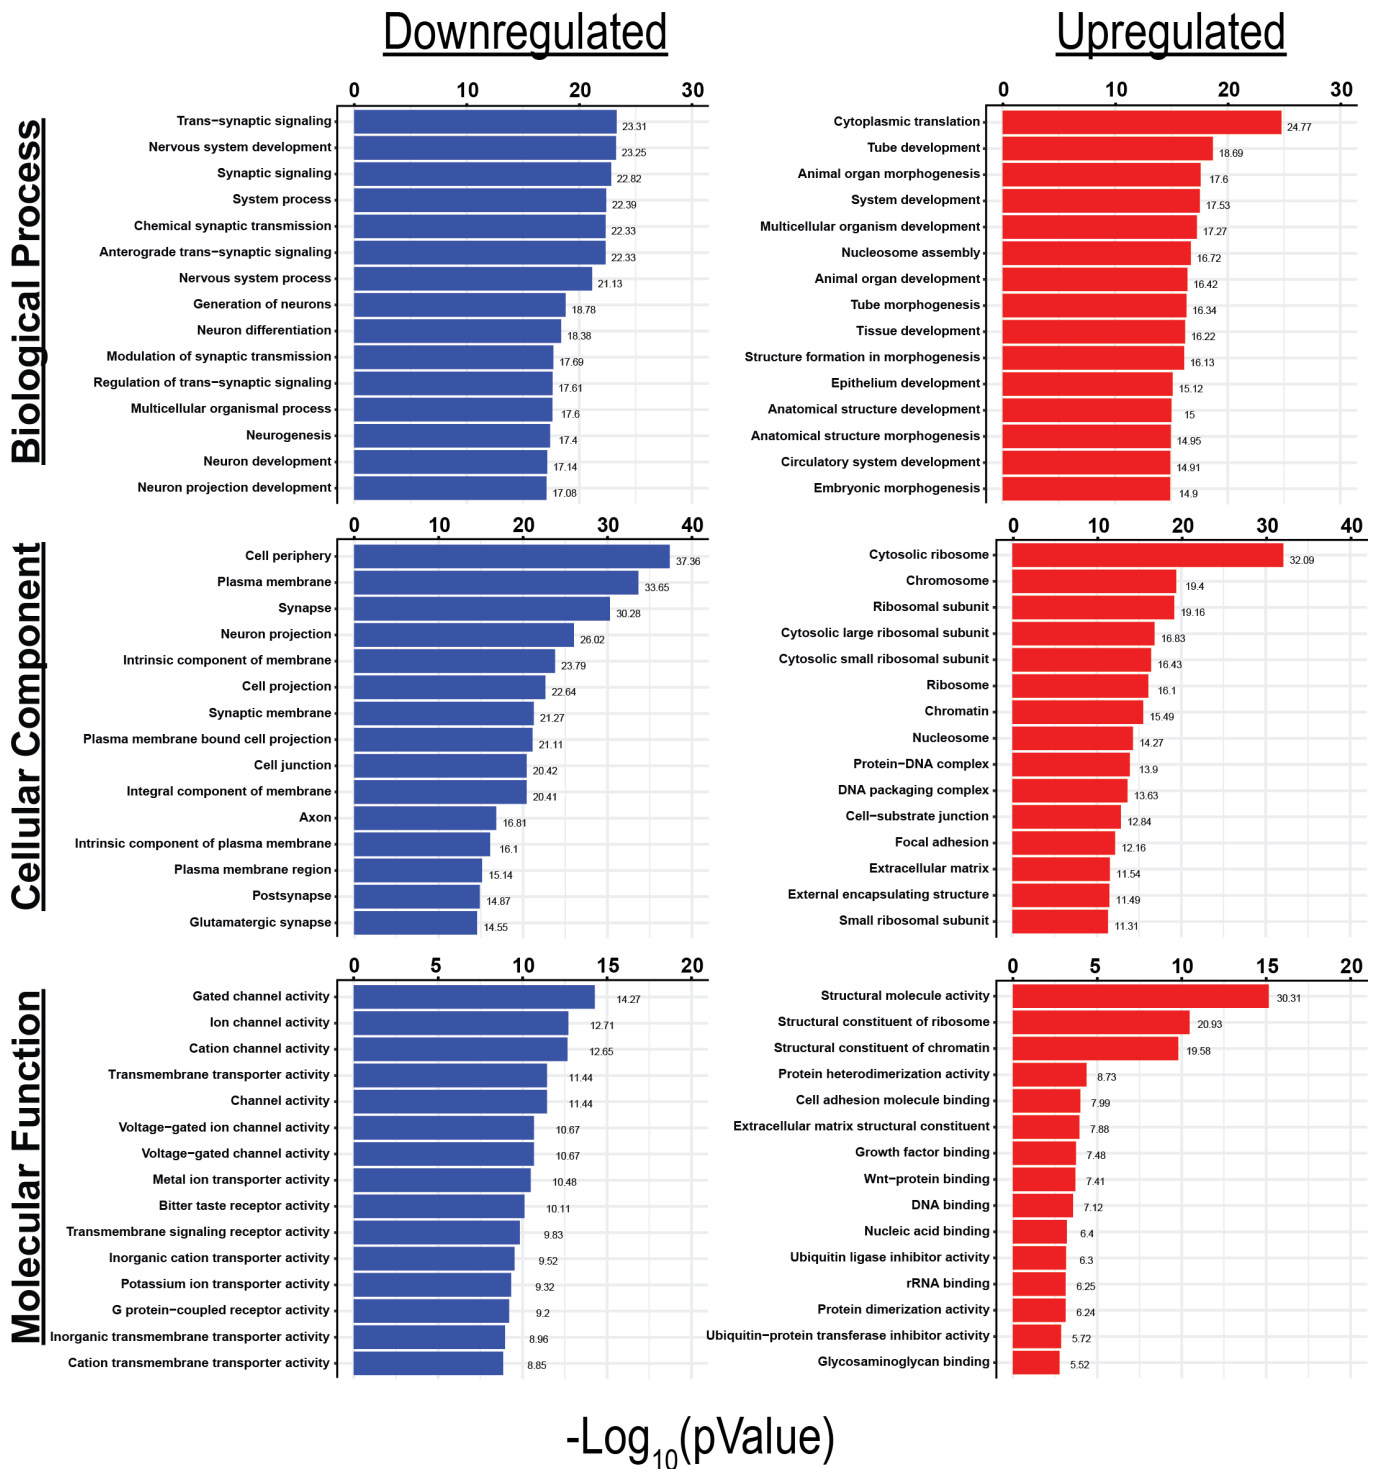

**Fig. S10. Gene ontology (GO) analysis of dysregulated transcripts detected in CANVAS patient vs control iPSC-derived neurons.** Full Gene Ontology (GO) pathway analysis of the top up and downregulated Biological Process, Cellular Component, and Molecular Functions in CANVAS patient vs control iPSC-derived neurons. N = 6 biological replicates from 3 individual CANVAS and control patients.

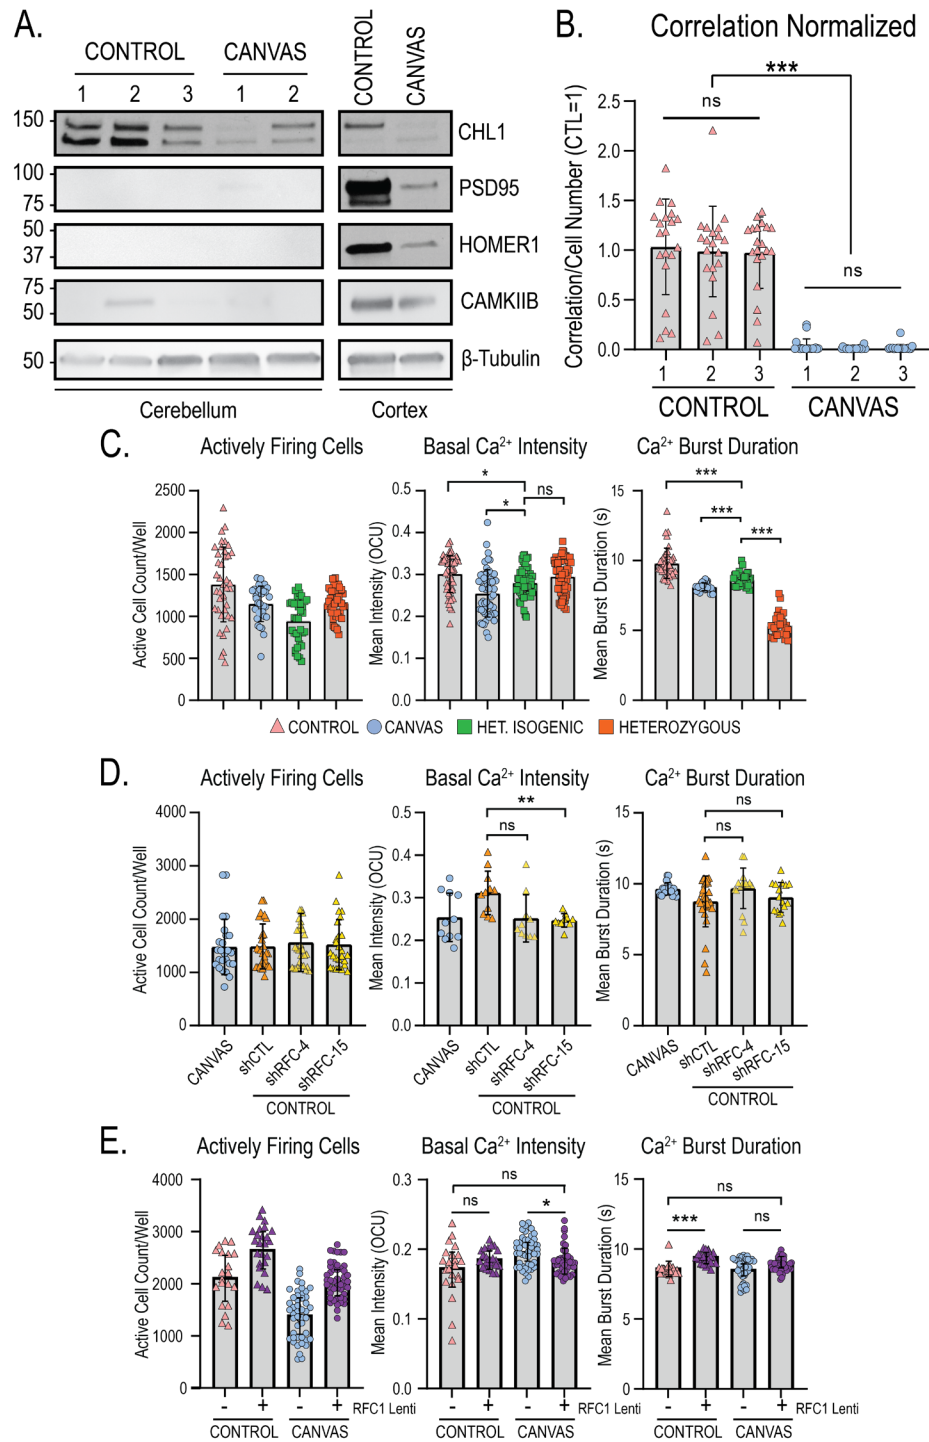

**Fig. S11. Calcium imaging metrics from CANVAS patient and control iPSC-derived neurons.** A) Protein expression analysis for selected synaptic proteins in cerebellar and cortical post-mortem tissue for available control and CANVAS patients. B) Firing correlation analysis of control (n=3) and CANVAS (n=3) patient iPSC-derived neurons normalized to the number of active cells ( $F(5,114) = 59.89$ ,  $P < 0.0001$ ). C) Analysis of Ca<sup>2+</sup> imaging metrics for control (n=3), CANVAS (n=3), Heterozygous (n=1) and Heterozygous Isogenic (n=1) patient iPSC-derived neurons. Basal Intensity ( $F(2, 165) = 14.31$ ,  $P < 0.0001$ ), Burst Duration ( $F(2, 101) = 48.79$ ,  $P < 0.0001$ ). D) Analysis of Ca<sup>2+</sup> imaging metrics for CANVAS (n=3) and control (n=3) patient iPSC-derived neurons treated with shControl or shRFC1

exon4/exon15 lentiviruses. Basal Intensity ( $F(3, 78) = 4.279, P=0.011$ ), Burst Duration ( $F(3, 78) = 2.520, P=0.0641$ ). E) Analysis of  $Ca^{2+}$  imaging metrics for control ( $n=3$ ) and CANVAS ( $n=3$ ) patient iPSC-derived neurons treated with control or RFC1-overexpression lentivirus. Basal Intensity ( $F(3, 135) = 5.621, P=0.0012$ ), Burst Duration ( $F(3, 135) = 14.42, P<0.0001$ ). Each data point represents the mean of ~1000-3000 active cells per well. Data were analyzed by one-way ANOVA with Sidak's post-hoc multiple comparison tests.  $N= 3$  biological replicates, error = SD.

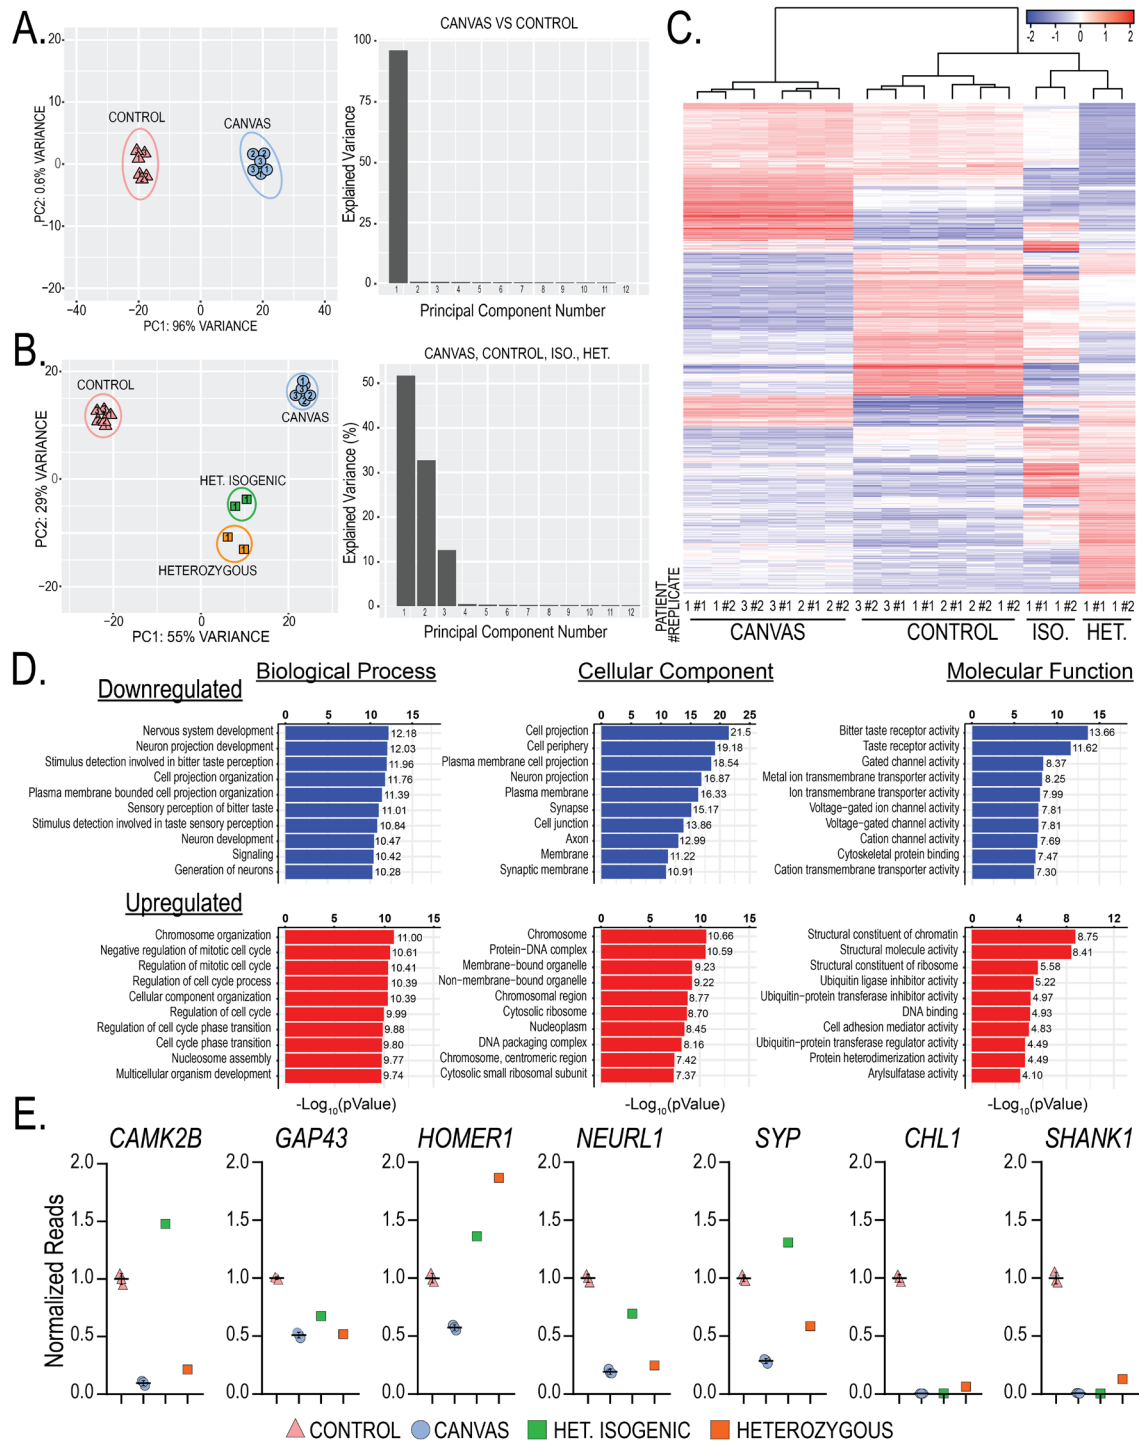

**Fig. S12. Supplemental data of transcriptomic analyses from control, CANVAS, heterozygous, and heterozygous isogenic correction patient iPSC-derived neurons.** A) Principal component analyses of CANVAS (n=3) vs control (n=3) patient iPSC-derived neurons (left) with scree plot of explained variance with principal component axis of variance per sample shown for PC1 and PC2 (right). B) CANVAS (n=3), control (n=3), heterozygous (n=1), and Heterozygous Isogenic (n=1) patient iPSC-derived neurons (left) with principal component axis of variance per sample shown for PC1 and PC2 (right). C) Heatmap of normalized expression for the top 1000 genes differentially expressed in CANVAS, control, and CANVAS isogenic patient iPSC-derived neurons. D) Gene Ontology (GO) pathway analysis of the top



up/downregulated Biological Process, Cellular Component, and Molecular Function for the genes that showed significant expression correction in heterozygous isogenic iPSC-derived neurons compared to CANVAS/control. E) Normalized read counts for *CAMK2B*, *GAP43*, *HOMER1*, *NEURL1*, *SYP*, *CHLI*, and *SHANK1* from control (n=6), CANVAS (n=6), and isogenic (n=2) iPSC-derived neurons.

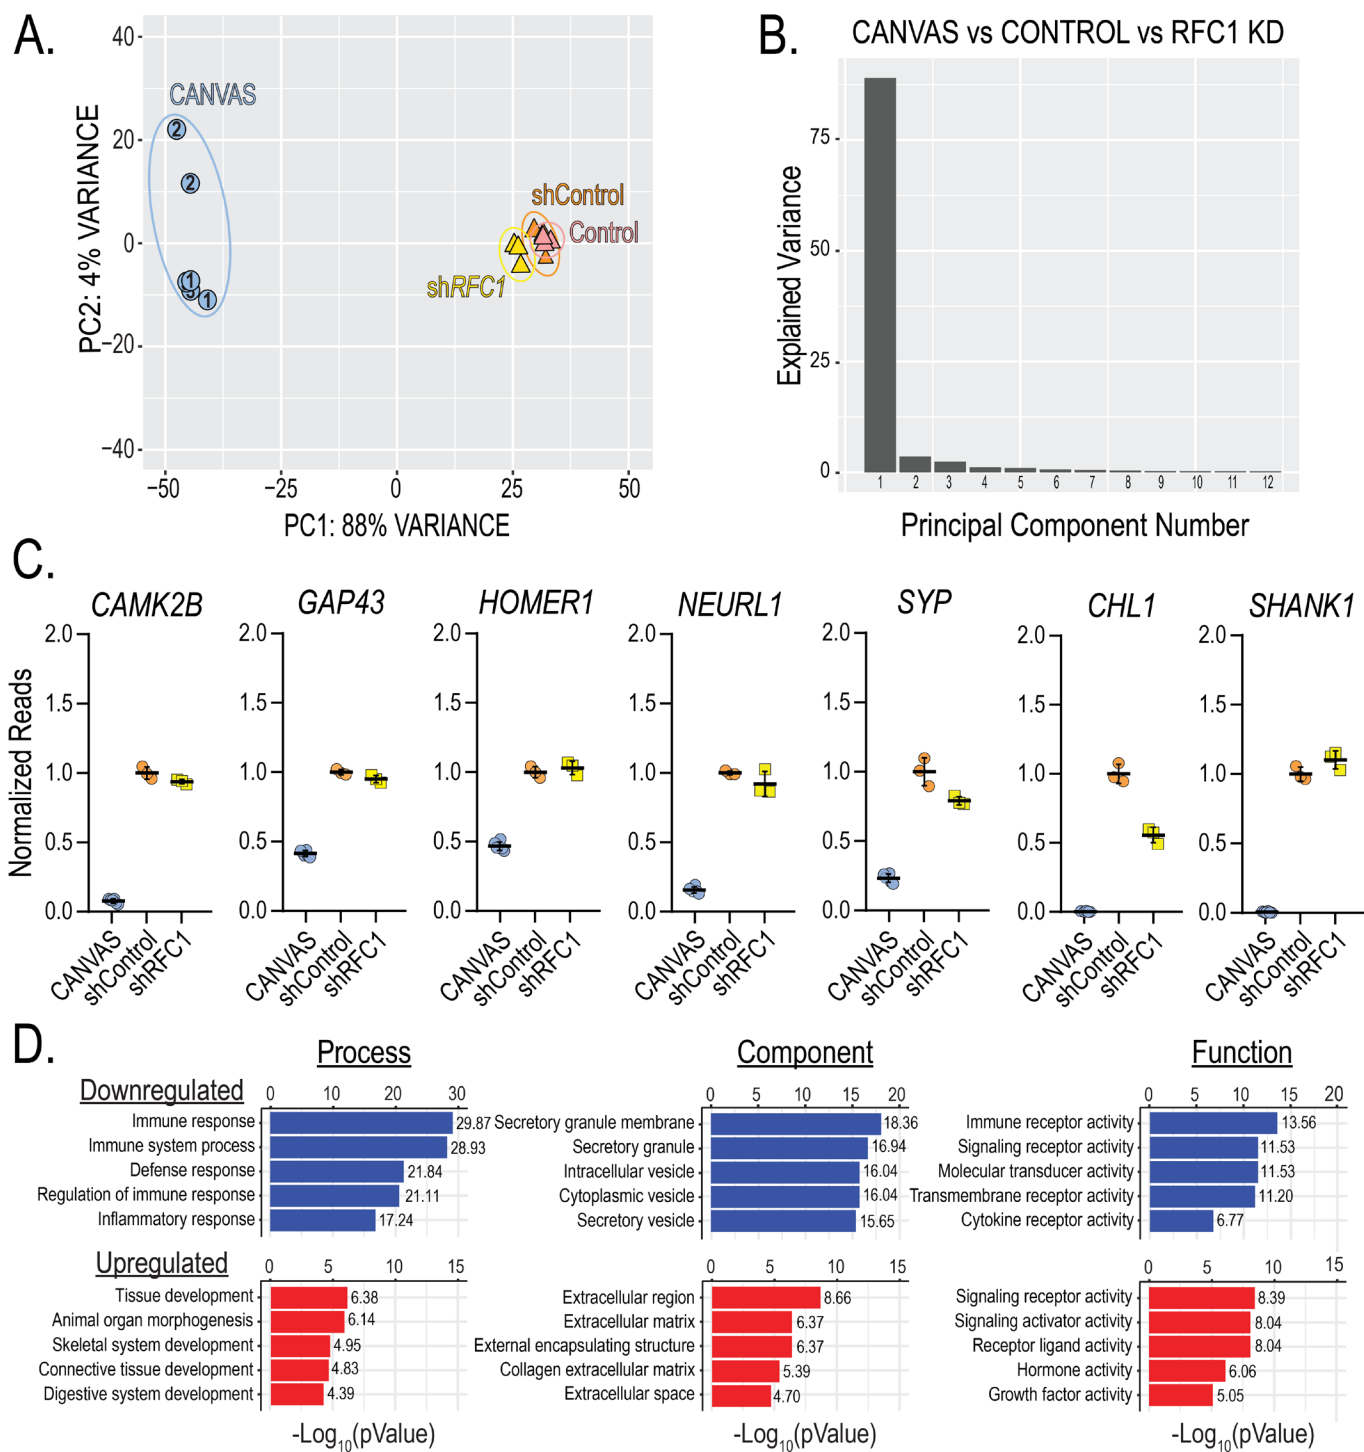

**Fig. S13. Supplemental data to RFC1 knockdown RNASeq analyses.** A) Principal component analyses of CANVAS (n=6), control (n=3), control *shControl* (n=3), and control *shRFC1* (n=3) patient iPSC-derived neurons. B) Scree plots of explained variance with principal component axis of variance per sample shown for PC1 and PC2. C) Normalized read counts for *CAMK2B*, *GAP43*, *HOMER1*, *NEURL1*, *SYP*, *CHL1*, and *SHANK1* from CANVAS (n=6), *shControl* (n=3), and *shRFC1* (n=3) iPSC-derived neurons. D) Gene Ontology (GO) pathway analysis of the top up/downregulated Biological Process, Cellular Component, and Molecular Function for the genes that showed significant expression correction in RFC1 knockdown iPSC-derived neurons compared to CANVAS/control.

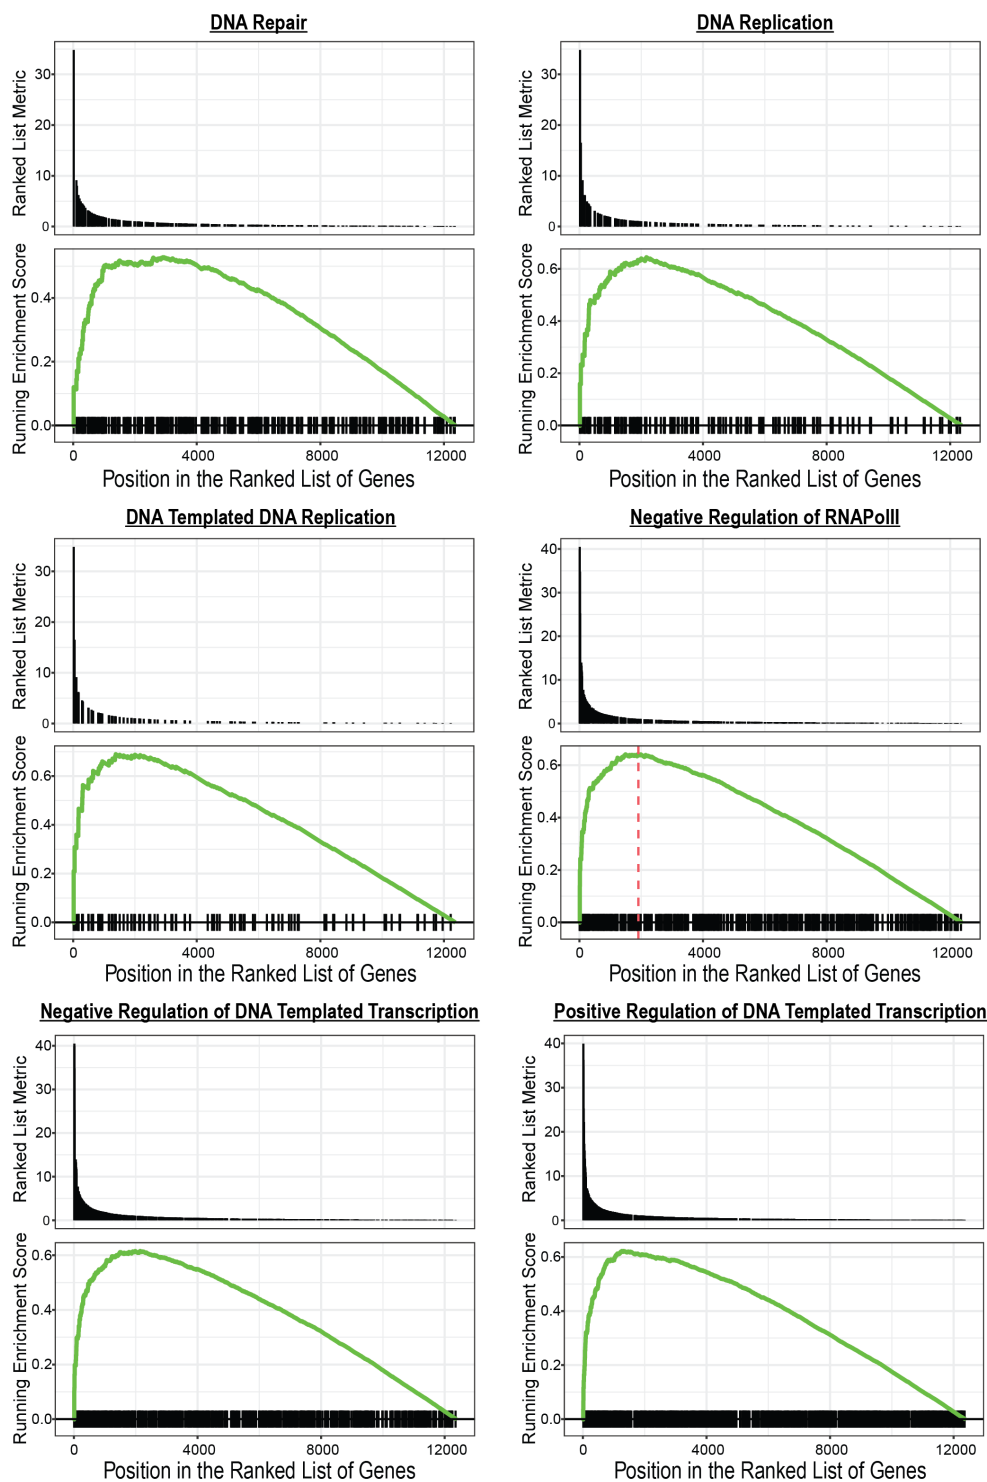

**Fig. S14. Gene set enrichment analysis (GSEA) of RFC1-associated functions in RFC1 knockdown control iPSC-derived neurons.** Gene set enrichment analysis (GSEA) of the RFC1-associated functions DNA repair, DNA replication, DNA templated DNA replication, negative regulation of RNA Pol II, and positive and negative regulation of DNA templated transcription in RFC1 knockdown control iPSC-derived neurons.

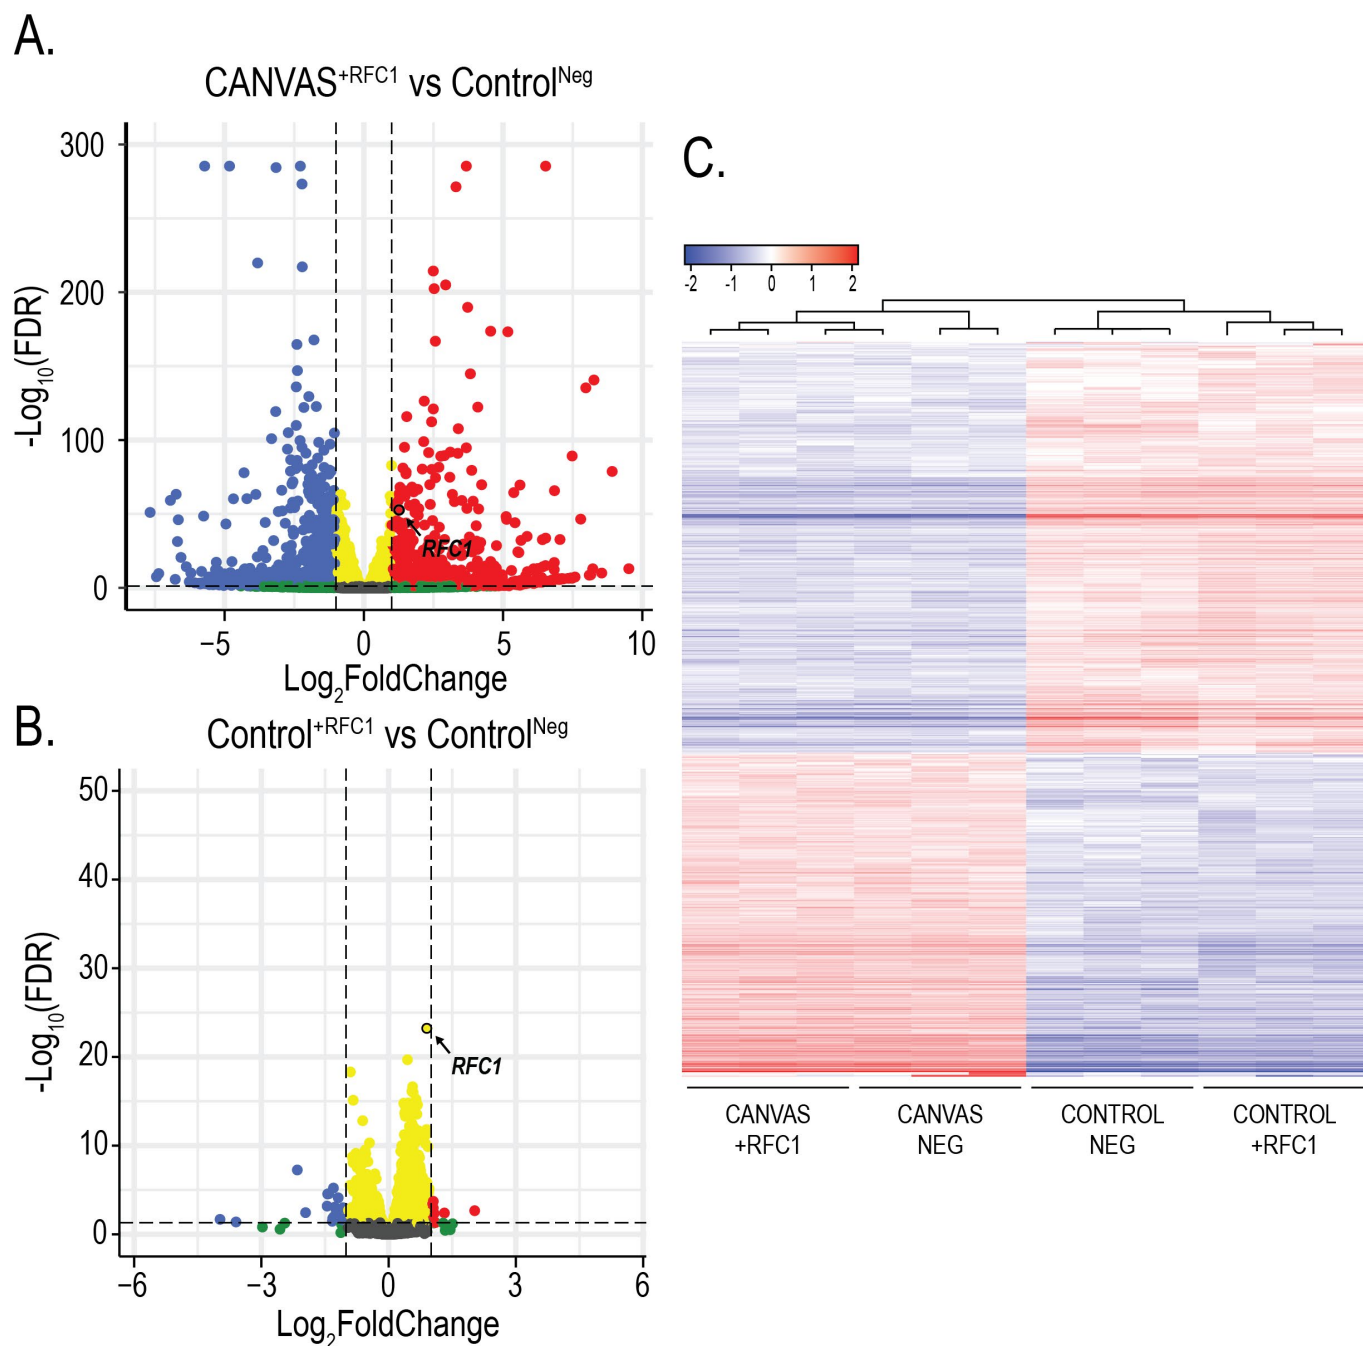

**Fig. S15. RFC1 reprovision RNaseq analyses.** A) Volcano plot of  $-\text{Log}_{10}\text{FDR}$  vs  $\text{Log}_2(\text{Fold Change})$  for CANVAS patient-derived neurons transduced with either full-length *RFC1* CDS lentivirus or control lentivirus ( $n=3/\text{group}$ ), *RFC1* labelled. B) Volcano plot of  $-\text{Log}_{10}\text{FDR}$  vs  $\text{Log}_2(\text{Fold Change})$  for control-derived neurons transduced with either full-length *RFC1* CDS lentivirus or control lentivirus ( $n=3/\text{group}$ ), *RFC1* labelled. C) Heatmap of normalized expression for the top 1000 genes differentially expressed in CANVAS, control, and CANVAS isogenic patient iPSC-derived neurons.

| Purpose                                  | Primers                                                                                                                                                                                                                                                                                                                                                                                                                                                                                                                                                                                              | Reagents                                                                                                                                                                          | Conditions                                                             |
|------------------------------------------|------------------------------------------------------------------------------------------------------------------------------------------------------------------------------------------------------------------------------------------------------------------------------------------------------------------------------------------------------------------------------------------------------------------------------------------------------------------------------------------------------------------------------------------------------------------------------------------------------|-----------------------------------------------------------------------------------------------------------------------------------------------------------------------------------|------------------------------------------------------------------------|
| NHEJ CRISPR                              | Fwd gRNA: GAGAATAGCAACGGTGTAGCTGG<br>Rev gRNA: TCATTTCTGAAATACGGACAGG                                                                                                                                                                                                                                                                                                                                                                                                                                                                                                                                | 20uM HiFi Cas9 (IDT)<br>tracR-ATTO550 (IDT) 1:1 gRNA(total)<br>120ul R-Buffer                                                                                                     | 1450V, 10ms, 3-pulses                                                  |
| Non-Edited Screening Repeat-Flanking PCR | Fwd: CTGAAGTGATTGGCCTGTCTCCC<br>Rev: CACTGGATCAAGGACAGAGTCA                                                                                                                                                                                                                                                                                                                                                                                                                                                                                                                                          | 2X Faststart Master Mix (Roche)<br>Primers 0.5 M                                                                                                                                  | 95°C 4 min<br>[95°C 30s, 60°C 30s, 72°C 60s] x35                       |
| Edited Screening Repeat-Spanning PCR     | Fwd: GGGTGGTGGCTGTCTCATC<br>Rev: CACTGGATCAAGGACAGAGTCA                                                                                                                                                                                                                                                                                                                                                                                                                                                                                                                                              | gDNA 50 ng                                                                                                                                                                        | 72 C 5 min                                                             |
| Repeat-Primed PCR                        | Fwd: FAM-TCAAGTGATACTCCAGCTACACCGT<br><br>Anchor: CAGGAAACAGCTATGACC<br><br><b>(AAAAG)11 Allele</b><br><br>Rev1: CAGGAAACAGCTATGACCAACAGAGCAAGACTCTGTTTCAAAAAGAAAAGAAAAGAAAAGAAA<br>Rev2: CAGGAAACAGCTATGACCAACAGAGCAAGACTCTGTTTCAAAAAGAAAAGAAAAGAAAAGAAA<br>Rev3: CAGGAAACAGCTATGACCAACAGAGCAAGACTCTGTTTCAAAAAGAAAAGAAAAGAAAAGAAA<br><br><b>(AAGGG)exp Allele</b><br><br>Rev1: CAGGAAACAGCTATGACCAACAGAGCAAGACTCTGTTTCAAAAAGGGAAGGGAAGGGAAGGGAA<br>Rev2: CAGGAAACAGCTATGACCAACAGAGCAAGACTCTGTTTCAAAAAGGGAAGGGAAGGGAAGGGAA<br>Rev3: CAGGAAACAGCTATGACCAACAGAGCAAGACTCTGTTTCAAAAAGGGAAGGGAAGGGAAGGGAA | 2X Phusion Flash High-Fidelity PCR Master Mix (ThermoFisher)<br><br>Fw Primer 0.5 M<br><br>Anchor 0.5 M<br>Rv primers (Rv1:Rv2:Rv3=1:1:1) 0.05 M<br><br>DMSO 3%<br><br>gDNA 50 ng | 98°C 3 min<br><br>[98°C 10s, 65°C 15s, 72°C 60s] x35<br><br>72°C 5 min |
| Intron 2 Retention Screening             | Exon 2 Fwd: CATTTCGAAATTCTTTGGAGTA<br>Exon 3 Rev: ATCCTCTTTACGGGAGCTATTTAC<br>Intron 2 Rev: TCAATGCAAAATTATACCCAGA                                                                                                                                                                                                                                                                                                                                                                                                                                                                                   | 2X Faststart Master Mix (Roche)<br>Primers 0.5 M<br>gDNA 50 ng                                                                                                                    | 95°C 4 min<br>[95°C 30s, 59°C 30s, 72°C 60s] x35<br>72 C 5 min         |
| qRT-PCR                                  | RFC1: FAM-MGB Taqman Probes (Thermo Hs01099126_m1, Exon14-15, Amplicon Length 70 bp)<br>Actin: VIC-MGB-PL Taqman Probes (Thermo Hs99999903_m1, Exon 1, Amplicon Length 171 bp)                                                                                                                                                                                                                                                                                                                                                                                                                       | TaqMan™ 2X Universal PCR Master Mix (ThermoFisher)<br>1X RFC1 FAM Taqman Probes<br>1X Actin VIC Taqman Probes<br>2 µl cDNA                                                        | 95°C 20s<br>[95°C 5s, 60°C 20s] x40                                    |

**Table S1.**

Table of PCR primer sequences, reagents, and thermocycling conditions used.



| Sample ID     | Genotype | Source                            | Blinded Analysis #1 |          |            | Blinded Analysis #2 |          |            | Avg % Positive |
|---------------|----------|-----------------------------------|---------------------|----------|------------|---------------------|----------|------------|----------------|
|               |          |                                   | Total Cells         | Positive | % Positive | Total Cells         | Positive | % Positive |                |
| BN-16-198     | CANVAS   | Mass General Brigham SCiN         | 276                 | 205      | 74.28      | 268                 | 189      | 70.52      | 72.40          |
| 2008-030      | CANVAS   | Netherlands Brain Bank            | 325                 | 165      | 50.77      | 459                 | 179      | 39.00      | 44.88          |
| P15-99 23     | CANVAS   | Queen Square Brain Bank UCL       | 352                 | 77       | 21.88      | 513                 | 74       | 14.42      | 18.15          |
| P41-20-22     | CANVAS   | Queen Square Brain Bank UCL       | 286                 | 3        | 1.05       | 576                 | 0        | 0.00       | 0.52           |
| 198           | C9       | University of Michigan Brain Bank | 363                 | 0        | 0.00       | 546                 | 0        | 0.00       | 0.00           |
| 1233          | C9       | University of Michigan Brain Bank | 360                 | 0        | 0.00       | 513                 | 0        | 0.00       | 0.00           |
| 1875          | HD       | University of Michigan Brain Bank | 440                 | 0        | 0.00       | 597                 | 0        | 0.00       | 0.00           |
| 113           | HD       | University of Michigan Brain Bank | 529                 | 7        | 1.32       | 740                 | 0        | 0.00       | 0.66           |
| 02-AA-257     | SCA3     | University of Michigan Brain Bank | 376                 | 9        | 2.39       | 692                 | 0        | 0.00       | 1.20           |
| 1532          | Control  | University of Michigan Brain Bank | 300                 | 32       | 10.67      | 380                 | 15       | 3.95       | 7.31           |
| T-357         | Control  | University of Michigan Brain Bank | 384                 | 0        | 0.00       | 430                 | 0        | 0.00       | 0.00           |
| 1033          | Control  | University of Michigan Brain Bank | 354                 | 3        | 0.85       | 515                 | 0        | 0.00       | 0.42           |
| 1522          | Control  | University of Michigan Brain Bank | 333                 | 2        | 0.60       | 357                 | 0        | 0.00       | 0.30           |
| 02-AA-185     | Control  | University of Michigan Brain Bank | 393                 | 0        | 0.00       | 346                 | 0        | 0.00       | 0.00           |
| 1073          | Control  | University of Michigan Brain Bank | 440                 | 1        | 0.23       | 558                 | 0        | 0.00       | 0.11           |
| 382 02-AA-185 | Control  | University of Michigan Brain Bank | 431                 | 2        | 0.46       | 561                 | 2        | 0.36       | 0.41           |
| T-346         | Control  | University of Michigan Brain Bank | 164                 | 0        | 0.00       | 178                 | 0        | 0.00       | 0.00           |
| P64-11 22     | Control  | University College London         | 394                 | 90       | 22.84      | 490                 | 65       | 13.27      | 18.05          |
| P47-11 22     | Control  | University College London         | 307                 | 21       | 6.84       | 401                 | 1        | 0.25       | 3.54           |
| P38-19 22     | Control  | University College London         | 370                 | 5        | 1.35       | 492                 | 0        | 0.00       | 0.68           |

**Table S3.**

Full blinded quantitative analysis from CANVAS, control, and disease control post-mortem cerebellum anti-KGREG IHC.

| <b>Reagent or Resource</b>                              | <b>Source</b>                                                 | <b>Details</b>                              |
|---------------------------------------------------------|---------------------------------------------------------------|---------------------------------------------|
| <b>Cell Lines</b>                                       |                                                               |                                             |
| Control 1 (2E)                                          | Laboratory of Jack Parent, University of Michigan             | Tidball et al.(88), Mojica-Perez at al.(70) |
| Control 2 (NL-Xa 1071)                                  | Laboratory of Paul Hagerman, UC Davis                         | Liu et al.(89)                              |
| Control 3 (UM4-6)                                       | MStem Cell Laboratory of Gary Smith, University of Michigan   | NIH (hESC-12-0147). Haenfler et al.(90)     |
| CANVAS 1P                                               | Michigan Medicine (Dermal fibroblast patient sample)          | In-house episomal hiPSC reprogramming       |
| CANVAS 2P                                               | Michigan Medicine (Dermal fibroblast patient sample)          | In-house episomal hiPSC reprogramming       |
| CANVAS 3P                                               | Michigan Medicine (Dermal fibroblast patient sample)          | In-house episomal hiPSC reprogramming       |
| CANVAS 4P                                               | Laboratory of Vikram Khurana, Harvard Medicine, (Fibroblasts) | In-house episomal hiPSC reprogramming       |
| CANVAS 1P Isogenic                                      | CRISPR-edited CANVAS 1P line                                  | In-house episomal hiPSC reprogramming       |
| CANVAS 2C Heterozygous                                  | Michigan Medicine (Dermal fibroblast patient sample)          | In-house episomal hiPSC reprogramming       |
| <b>Patient Brains</b>                                   |                                                               |                                             |
| CANVAS 1                                                | Mass General Brigham SCiN                                     | BN-16-198-7(7)                              |
| CANVAS 2                                                | Netherlands Brain Bank                                        | 2008-030                                    |
| CANVAS 3                                                | Queen Square Brain Bank UCL                                   | P15-99 23                                   |
| CANVAS 4                                                | Queen Square Brain Bank UCL                                   | P41-20-22                                   |
| C9Orf72 ALS/FTD 1                                       | University of Michigan Brain Bank                             | 198                                         |
| C9Orf72 ALS/FTD 2                                       | University of Michigan Brain Bank                             | 1233                                        |
| Huntington's Disease 1                                  | University of Michigan Brain Bank                             | 1875                                        |
| Huntington's Disease 2                                  | University of Michigan Brain Bank                             | 113                                         |
| Spinocerebellar Ataxia Type 3 1                         | University of Michigan Brain Bank                             | 02-AA-257                                   |
| Unaffected Control 1                                    | University of Michigan Brain Bank                             | 1532                                        |
| Unaffected Control 2                                    | University of Michigan Brain Bank                             | T-357                                       |
| Unaffected Control 3                                    | University of Michigan Brain Bank                             | 1033                                        |
| Unaffected Control 4                                    | University of Michigan Brain Bank                             | 1522                                        |
| Unaffected Control 5                                    | University of Michigan Brain Bank                             | 02-AA-185                                   |
| Unaffected Control 6                                    | University of Michigan Brain Bank                             | 1073                                        |
| Unaffected Control 7                                    | University of Michigan Brain Bank                             | 382 02-AA-185                               |
| Unaffected Control 8                                    | University of Michigan Brain Bank                             | T-346                                       |
| Unaffected Control 9                                    | Queen Square Brain Bank UCL                                   | P64-11 22                                   |
| Unaffected Control 10                                   | Queen Square Brain Bank UCL                                   | P47-11 22                                   |
| Unaffected Control 11                                   | Queen Square Brain Bank UCL                                   | P38-19 22                                   |
| <b>iPSC Reprogramming</b>                               |                                                               |                                             |
| pCXLE-hUL                                               | Addgene                                                       | plasmid #27080                              |
| pCXLE-hSK                                               | Addgene                                                       | plasmid #27078                              |
| pCXLE-hOCT3/4-shP53                                     | Addgene                                                       | plasmid #27077                              |
| TeSR <sup>TM</sup> E7 <sup>TM</sup> Reprogramming Media | STEMCELL Technologies                                         | #05914                                      |
| <b>iPSC Maintenance</b>                                 |                                                               |                                             |
| TeSR <sup>TM</sup> E8 <sup>TM</sup> Maintenance Media   | STEMCELL Technologies                                         | #05990                                      |
| ROCK Inhibitor (Y-27632)                                | Cayman Chemicals                                              | #10005583                                   |



|                                    |                                    |                                 |
|------------------------------------|------------------------------------|---------------------------------|
| EDTA 0.5M                          | Lonza                              | #BMA51201                       |
| <b>Lentiviral Constructs</b>       |                                    |                                 |
| Lenti-EV-GFP-VSVG                  | University of Michigan Vector Core | 100x (1x10 <sup>8</sup> TU/mL)  |
| Lenti-pGipZ Scramble Control       | University of Michigan Vector Core | 100x (1x10 <sup>8</sup> TU/mL)  |
| Lenti-eF1a-RFC1-3xF-GFP            | VectorBuilder                      | 100x (1x10 <sup>8</sup> TU/mL)  |
| Lenti-shRFC1-Exon4-GFP             | Horizon Discovery                  | 100x (1x10 <sup>8</sup> TU/mL)  |
| Lenti-shRFC1-Exon15-GFP            | Horizon Discovery                  | 100x (1x10 <sup>8</sup> TU/mL)  |
| <b>SMAD-Neuron Differentiation</b> |                                    |                                 |
| Brainphys Neuronal SM1 Kit         | STEMCELL Technologies              | #05792                          |
| N-2 Supplement                     | ThermoFisher Scientific            | #17502001                       |
| Laminin                            | Millipore Sigma                    | #L2020                          |
| Recombinant Human BDNF             | PeproTech                          | #450-02                         |
| Recombinant Human GDNF             | PeproTech                          | #450-10                         |
| Bucladesine (dbcAMP)               | Cayman Chemicals                   | #14408                          |
| L-Ascorbic Acid                    | Sigma                              | #A4403                          |
| Accutase™                          | ThermoFisher                       | #00-4555-56                     |
| <b>Antibodies</b>                  |                                    |                                 |
| FLAG M2                            | Sigma                              | #F1804 (1:1000 WB, 1:100 ICC)   |
| KGREG                              | Abclonal                           | (1:500 WB, 1:100 ICC/IHC)       |
| PFPSL                              | Abclonal                           | (1:500 WB, 1:100 ICC/IHC)       |
| γ-H2AX                             | Abcam                              | #ab11174 (1:2000 WB, 1:500 ICC) |
| RFC1                               | GeneTex                            | #GTX129291 (1:2000 WB)          |
| β-Tubulin                          | DSHB                               | #E7 (1:1000 WB)                 |
| Oct4                               | Abcam                              | #ab181557 (1:250 ICC)           |
| Nanog                              | Biologend                          | #674202 (1:250 ICC)             |
| NeuN                               | MilliporeSigma                     | #MAB377 (1:500 ICC)             |
| CHL1                               | Abcam                              | #ab106269 (1:500 WB)            |
| CAMKIIB                            | Fisher                             | #13-9800 (1:1000 WB)            |
| Synaptophysin                      | Abcam                              | #ab32127 (1:1000 WB)            |
| SHANK1                             | Novus                              | #NB300-167 (1:1000 WB)          |
| GAP43                              | Fisher                             | #33-5000 (1:2000 WB)            |
| AlexaFluor Rabbit-488              | ThermoFisher                       | #A-11008 (1:1000 ICC 2°)        |
| AlexaFluor Rabbit-555              | ThermoFisher                       | #A-21428 (1:1000 ICC 2°)        |
| AlexaFluor Mouse-488               | ThermoFisher                       | #A-11001 (1:1000 ICC 2°)        |
| AlexaFluor Mouse-555               | ThermoFisher                       | #A-21422 (1:1000 ICC 2°)        |
| IRDye Rabbit-680rd                 | LI-COR                             | #926-68071 (1:5000 WB 2°)       |
| IRDye Rabbit-800cw                 | LI-COR                             | #926-32211 (1:5000 WB 2°)       |
| IRDye Mouse-680rd                  | LI-COR                             | #926-68070 (1:5000 WB 2°)       |
| IRDye Mouse-800cw                  | LI-COR                             | #926-32210 (1:5000 WB 2°)       |

**Table S4.**

Table of information for all cell lines, patient samples and reagents used in these studies

**Movie S1.**

Representative calcium imaging time course movie for human control neurons over a duration of 180s.

**Movie S2.**

Representative calcium imaging time course movie for human CANVAS neurons over a duration of 180s.

**Movie S3.**

Representative calcium imaging time course movie for CANVAS isogenic neurons over a duration of 180s.

Fig. S7A Uncropped Blots

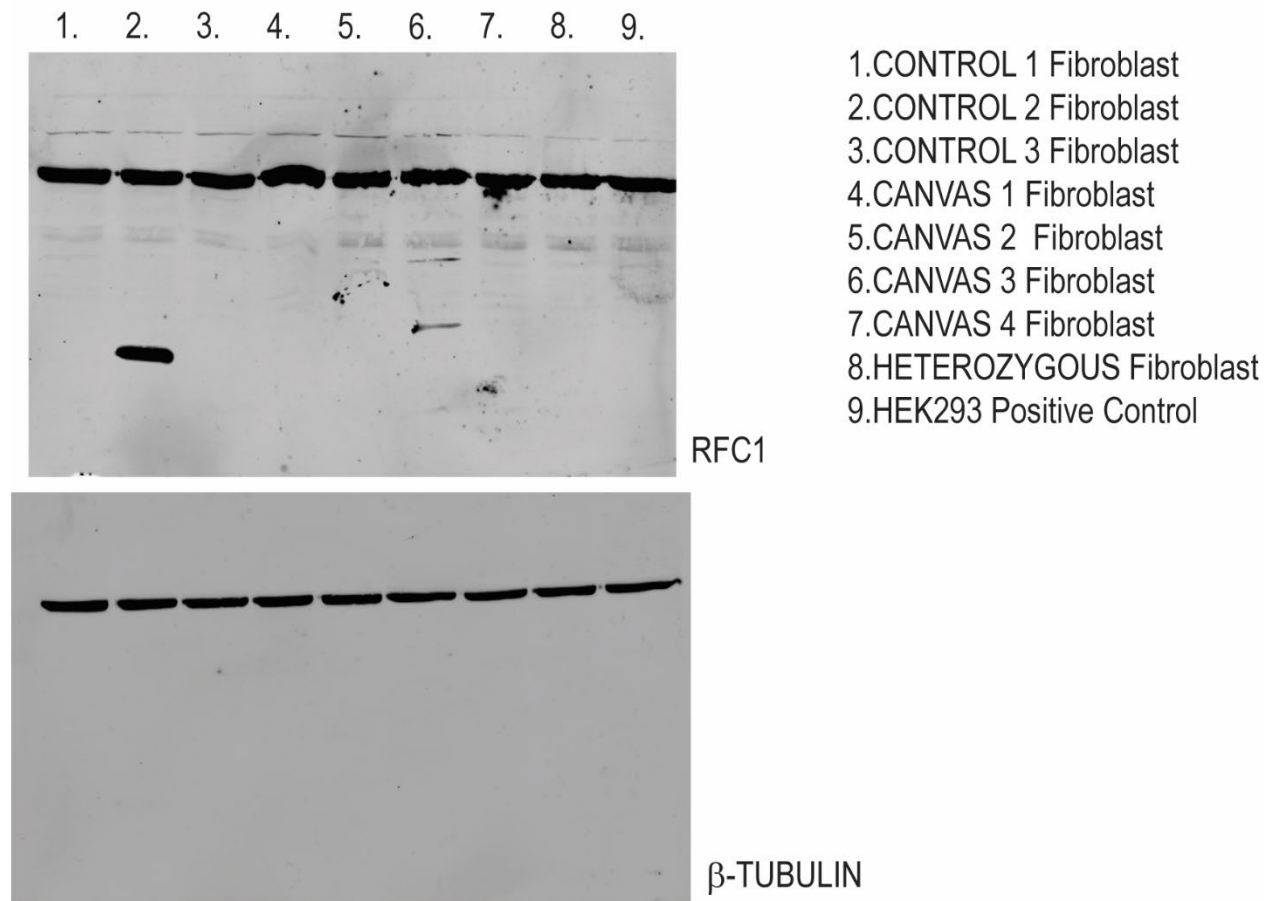

Supplement: sciadv.adn2321_sm.pdf [file sciadv.adn2321_sm.pdf]
